# Supplementary material for: New Sorbicillinoids with Tea Pathogenic Fungus Inhibitory Effect from Marine-Derived Fungus Hypocrea jecorina H8
Source: MDPI journal article supplement (doi:10.3390/md20030213), 2022-03-17
Supplement: s1 [file s1]

|                                                                                                          |    |
|----------------------------------------------------------------------------------------------------------|----|
| <b>Figure S1.</b> HR-ESI-MS spectra of compound <b>1</b> .....                                           | 2  |
| <b>Figure S2</b> <sup>1</sup> H-NMR (600 MHz, CDCl <sub>3</sub> ) of compound <b>1</b> .....             | 2  |
| <b>Figure S3</b> <sup>13</sup> C-NMR (150 MHz, CDCl <sub>3</sub> ) of compound <b>1</b> .....            | 3  |
| <b>Figure S4</b> DEPT of compound <b>1</b> .....                                                         | 3  |
| <b>Figure S5.</b> HSQC spectrum of compound <b>1</b> .....                                               | 4  |
| <b>Figure S6.</b> COSY spectrum of compound <b>1</b> .....                                               | 4  |
| <b>Figure S7.</b> HMBC spectrum of compound <b>1</b> .....                                               | 5  |
| <b>Figure S8.</b> NOESY spectrum of compound <b>1</b> .....                                              | 5  |
| <b>Figure S9.</b> HR-ESI-MS spectra of compound <b>2</b> .....                                           | 6  |
| <b>Figure S10</b> <sup>1</sup> H-NMR (600 MHz, CDCl <sub>3</sub> ) of compound <b>2</b> .....            | 6  |
| <b>Figure S11</b> <sup>13</sup> C-NMR (150 MHz, CDCl <sub>3</sub> ) of compound <b>2</b> .....           | 7  |
| <b>Figure S12</b> DEPT of compound <b>2</b> .....                                                        | 7  |
| <b>Figure S13</b> HSQC spectrum of compound <b>2</b> .....                                               | 8  |
| <b>Figure S14</b> COSY spectrum of compound <b>2</b> .....                                               | 8  |
| <b>Figure S15</b> HMBC spectrum of compound <b>2</b> .....                                               | 9  |
| <b>Figure S16</b> NOESY spectrum of compound <b>2</b> .....                                              | 9  |
| <b>Figure S17</b> HR-ESI-MS spectra of compound <b>3</b> .....                                           | 10 |
| <b>Figure S18</b> UV spectrum of compound <b>3</b> .....                                                 | 10 |
| <b>Figure S19</b> <sup>1</sup> H-NMR (600 MHz, CDCl <sub>3</sub> ) of compound <b>3</b> .....            | 11 |
| <b>Figure S20</b> <sup>13</sup> C-NMR (150 MHz, CDCl <sub>3</sub> ) of compound <b>3</b> .....           | 11 |
| <b>Figure S21</b> DEPT of compound <b>3</b> .....                                                        | 12 |
| <b>Figure S22</b> HSQC spectrum of compound <b>3</b> .....                                               | 12 |
| <b>Figure S23</b> COSY spectrum of compound <b>3</b> .....                                               | 13 |
| <b>Figure S24</b> HMBC spectrum of compound <b>3</b> .....                                               | 13 |
| <b>Figure S25</b> NOESY spectrum of compound <b>3</b> .....                                              | 14 |
| <b>Figure S26</b> HR-ESI-MS spectra of compound <b>4</b> .....                                           | 15 |
| <b>Figure S27</b> UV spectrum of compound <b>4</b> .....                                                 | 15 |
| <b>Figure S28</b> <sup>1</sup> H-NMR (150 MHz, DMSO- <i>d</i> <sub>6</sub> ) of compound <b>4</b> .....  | 16 |
| <b>Figure S29</b> <sup>13</sup> C-NMR (600 MHz, DMSO- <i>d</i> <sub>6</sub> ) of compound <b>4</b> ..... | 16 |
| <b>Figure S30</b> HSQC spectrum of compound <b>4</b> .....                                               | 17 |
| <b>Figure S31</b> COSY spectrum of compound <b>4</b> .....                                               | 17 |
| <b>Figure S32</b> HMBC spectrum of compound <b>4</b> .....                                               | 18 |
| <b>Figure S33</b> HR-ESI-MS spectra of compound <b>5</b> .....                                           | 19 |
| <b>Figure S34</b> UV spectrum of compound <b>5</b> .....                                                 | 19 |
| <b>Figure S35</b> <sup>1</sup> H-NMR (600 MHz, CDCl <sub>3</sub> ) of compound <b>5</b> .....            | 20 |
| <b>Figure S36</b> <sup>13</sup> C-NMR (150 MHz, CDCl <sub>3</sub> ) of compound <b>5</b> .....           | 20 |
| <b>Figure S37.</b> HSQC spectrum of compound <b>5</b> .....                                              | 21 |
| <b>Figure S38.</b> COSY spectrum of compound <b>5</b> .....                                              | 21 |
| <b>Figure S39</b> HMBC spectrum of compound <b>5</b> .....                                               | 22 |
| <b>Figure S40</b> NOESY spectrum of compound <b>5</b> .....                                              | 22 |
| ECD calculation of compound <b>1</b> .....                                                               | 23 |
| ECD calculation of compound <b>2</b> .....                                                               | 29 |
| ECD calculation of compound <b>3</b> .....                                                               | 36 |
| <b>Figure S41</b> Calculated and experimental ECD spectra of trichodermolide B .....                     | 59 |

**Figure S42** HR-ESI-MS spectra of compound **11**.....59

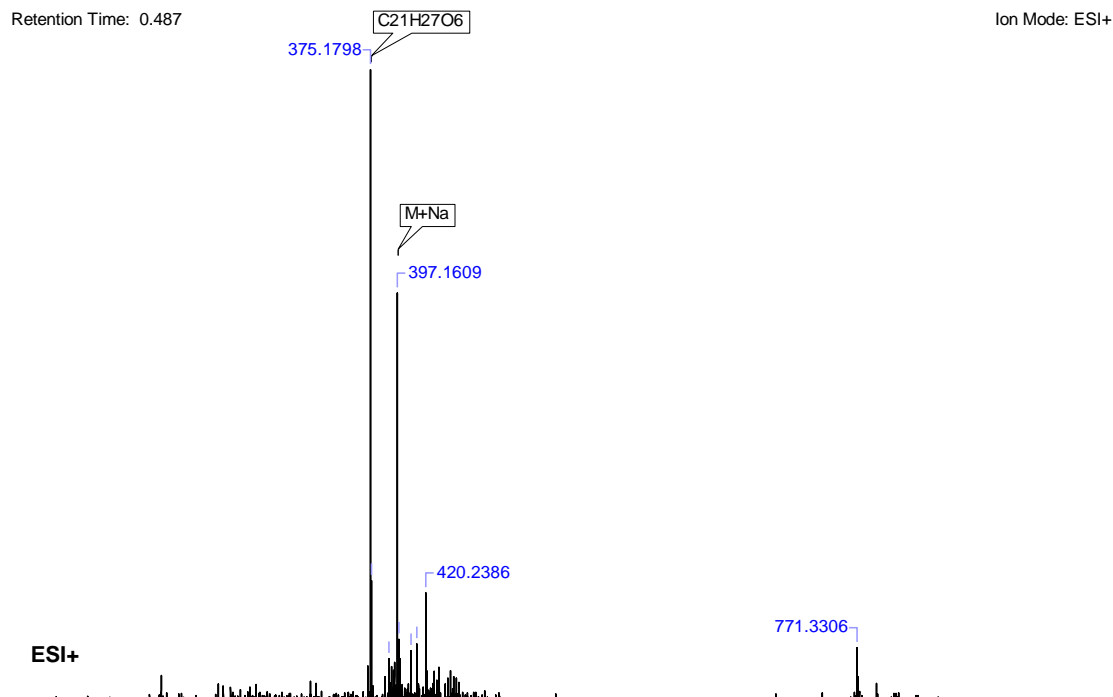

**Figure S1.** HR-ESI-MS spectra of compound **1**

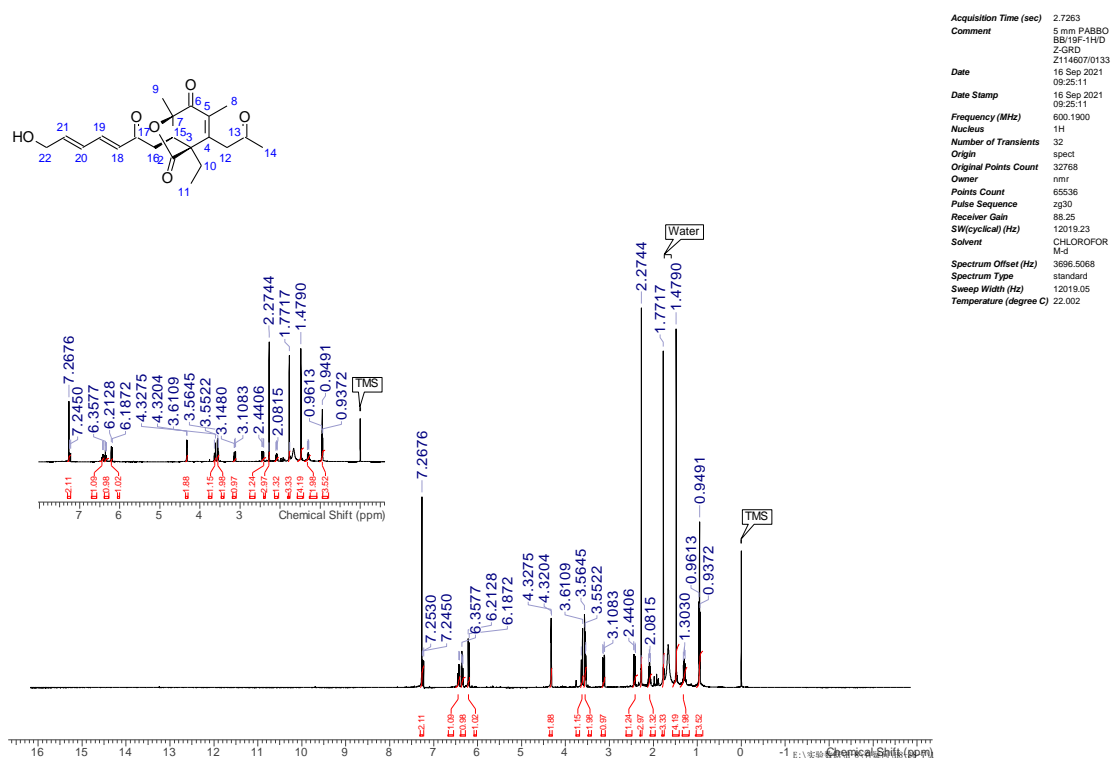

**Figure S2** <sup>1</sup>H-NMR (600 MHz, CDCl<sub>3</sub>) of compound **1**

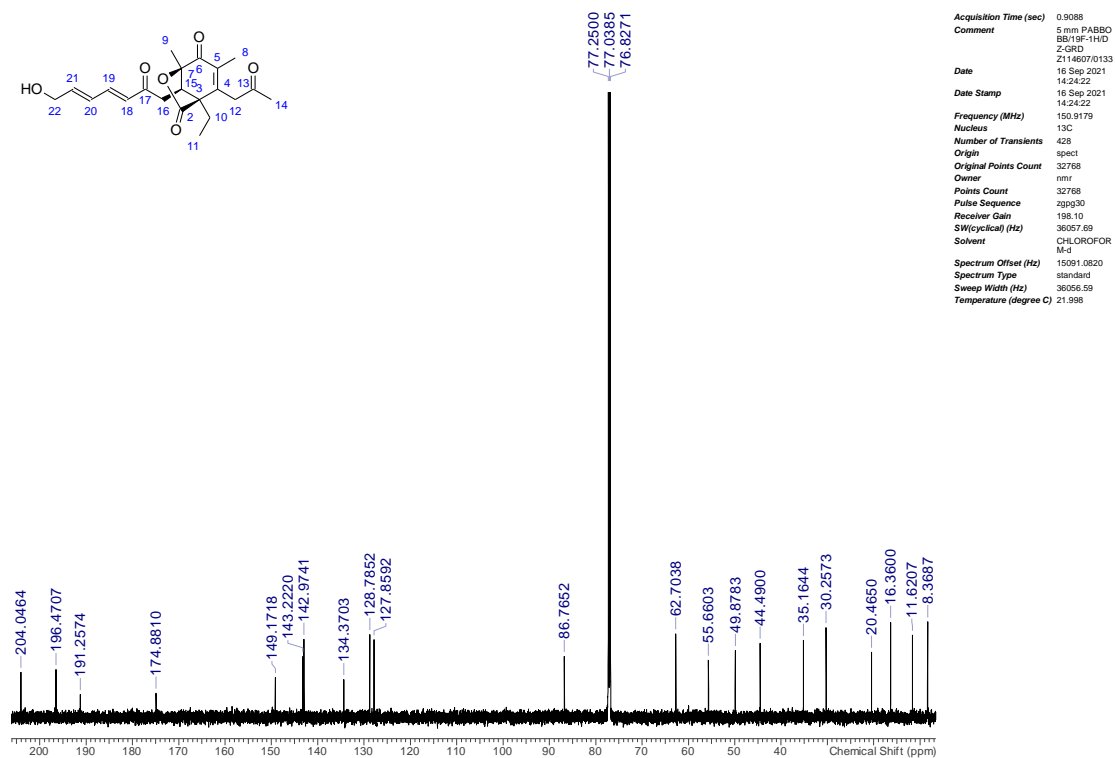

**Figure S3** <sup>13</sup>C-NMR (150 MHz, CDCl<sub>3</sub>) of compound **1**

DEPT H8-38-7.esp

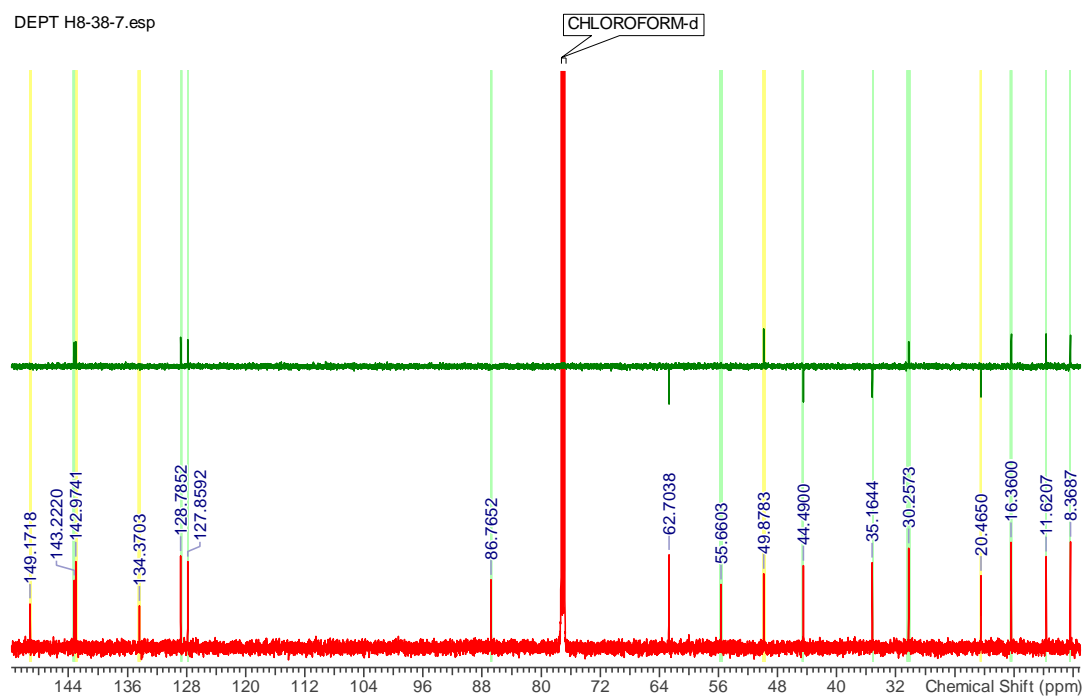

**Figure S4** DEPT of compound **1**

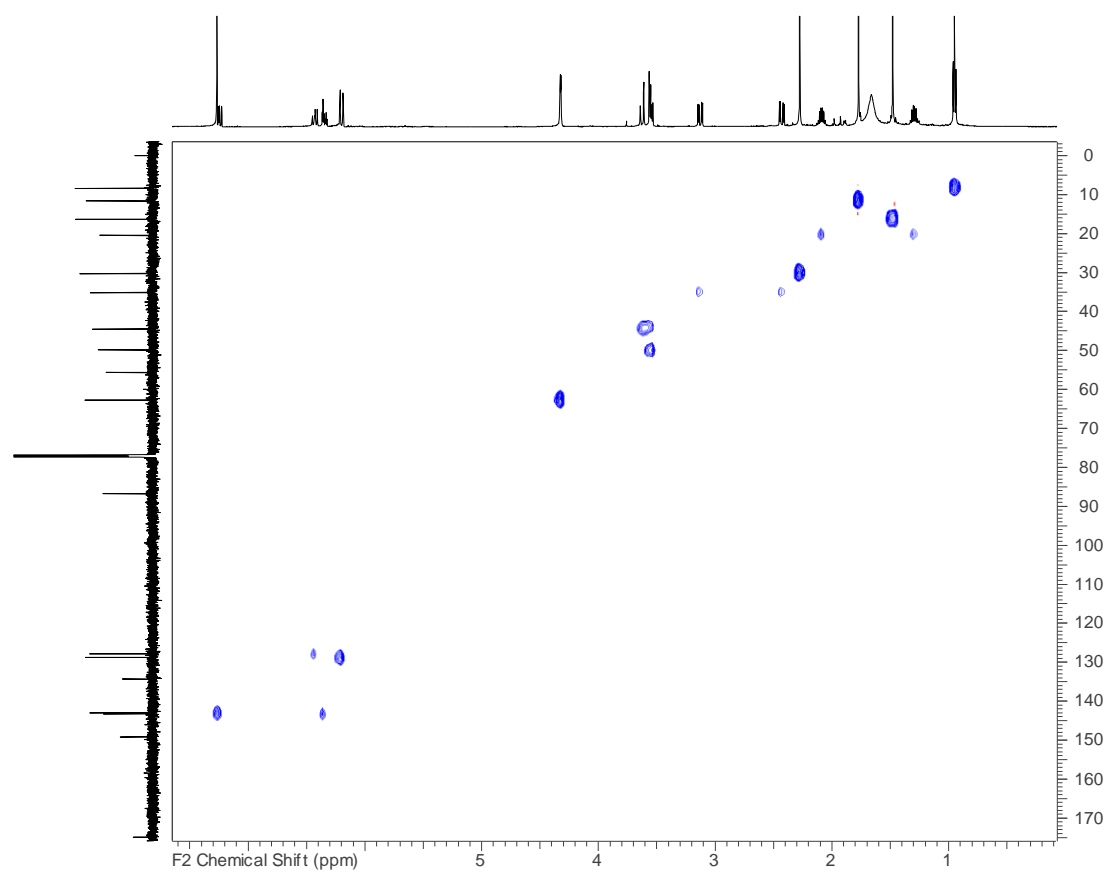

**Figure S5.** HSQC spectrum of compound **1**

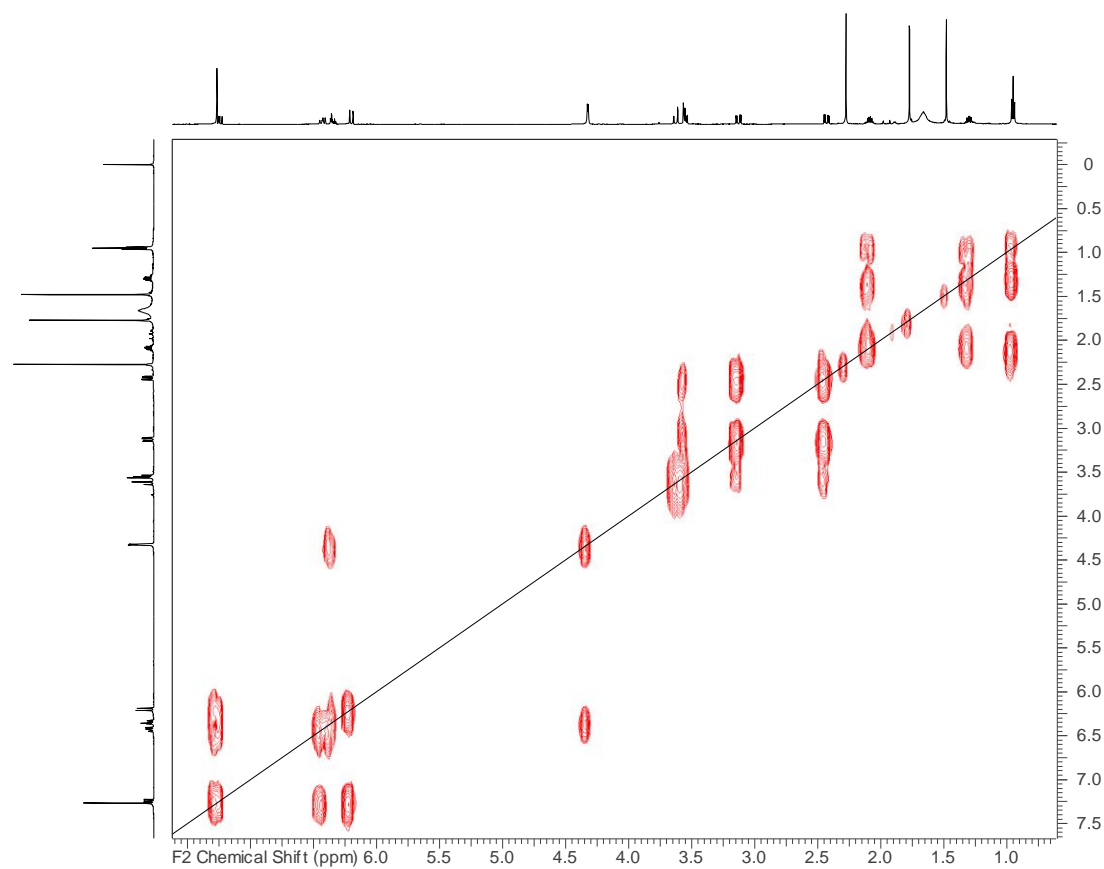

**Figure S6.** COSY spectrum of compound **1**

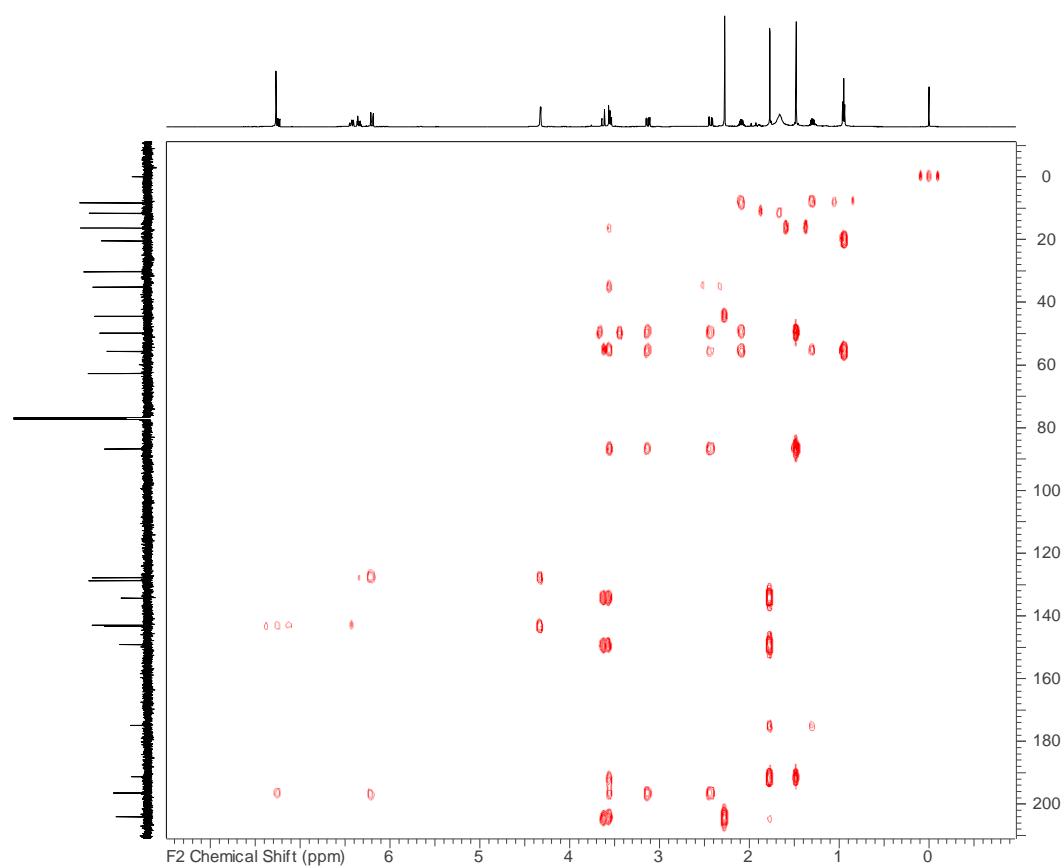

**Figure S7.** HMBC spectrum of compound **1**

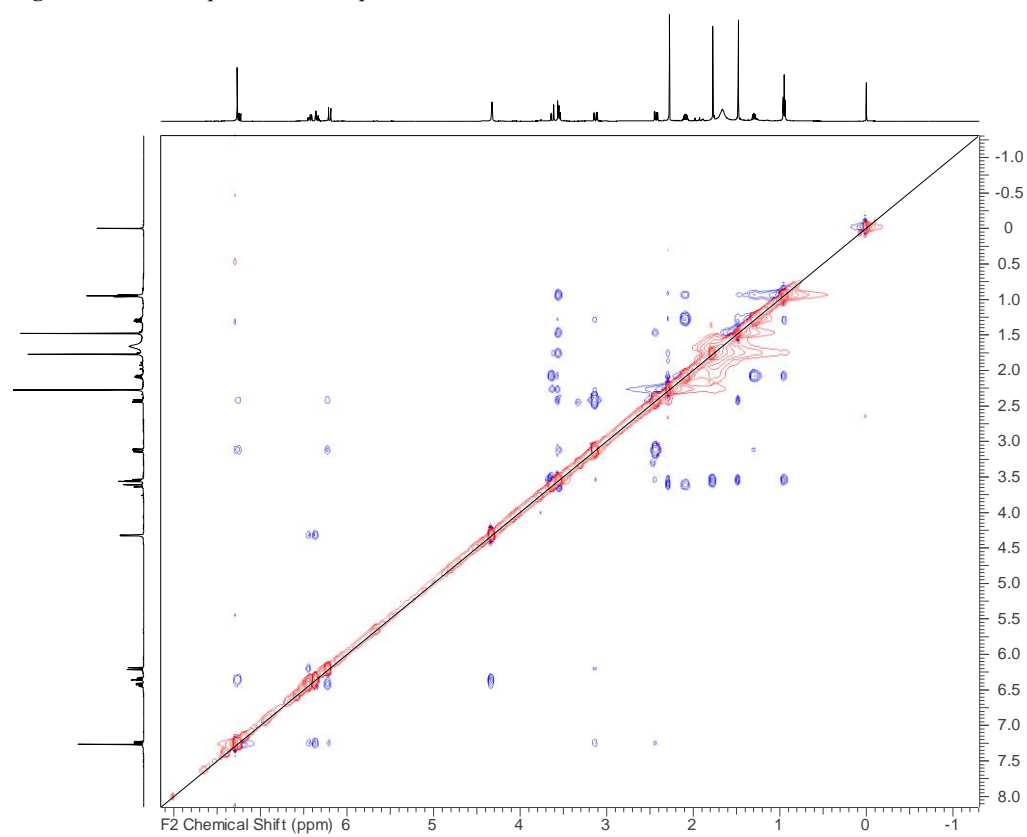

**Figure S8.** NOESY spectrum of compound **1**

Retention Time: 0.445

Ion Mode: ESI+

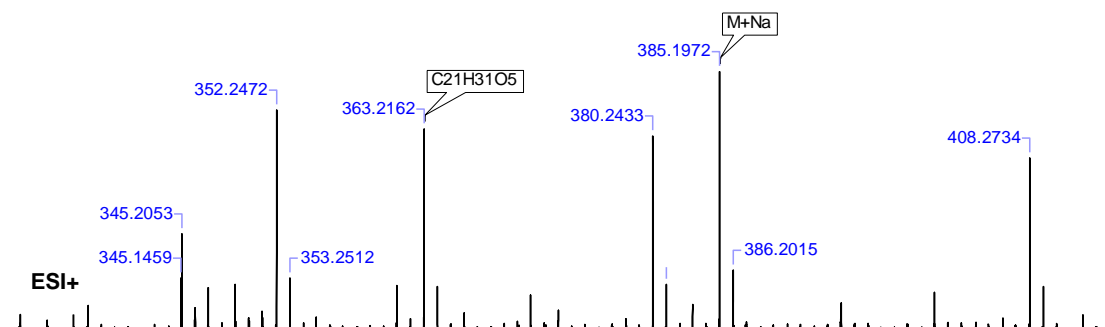

Figure S9. HR-ESI-MS spectra of compound 2

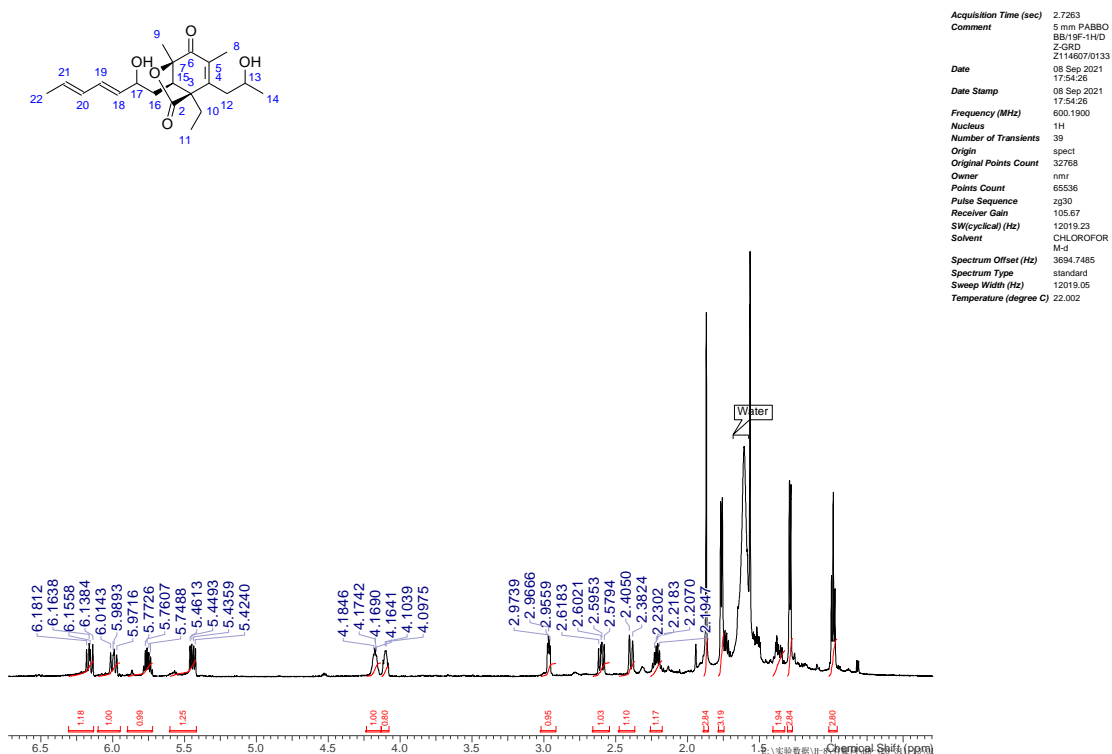

Figure S10 <sup>1</sup>H-NMR (600 MHz, CDCl<sub>3</sub>) of compound 2



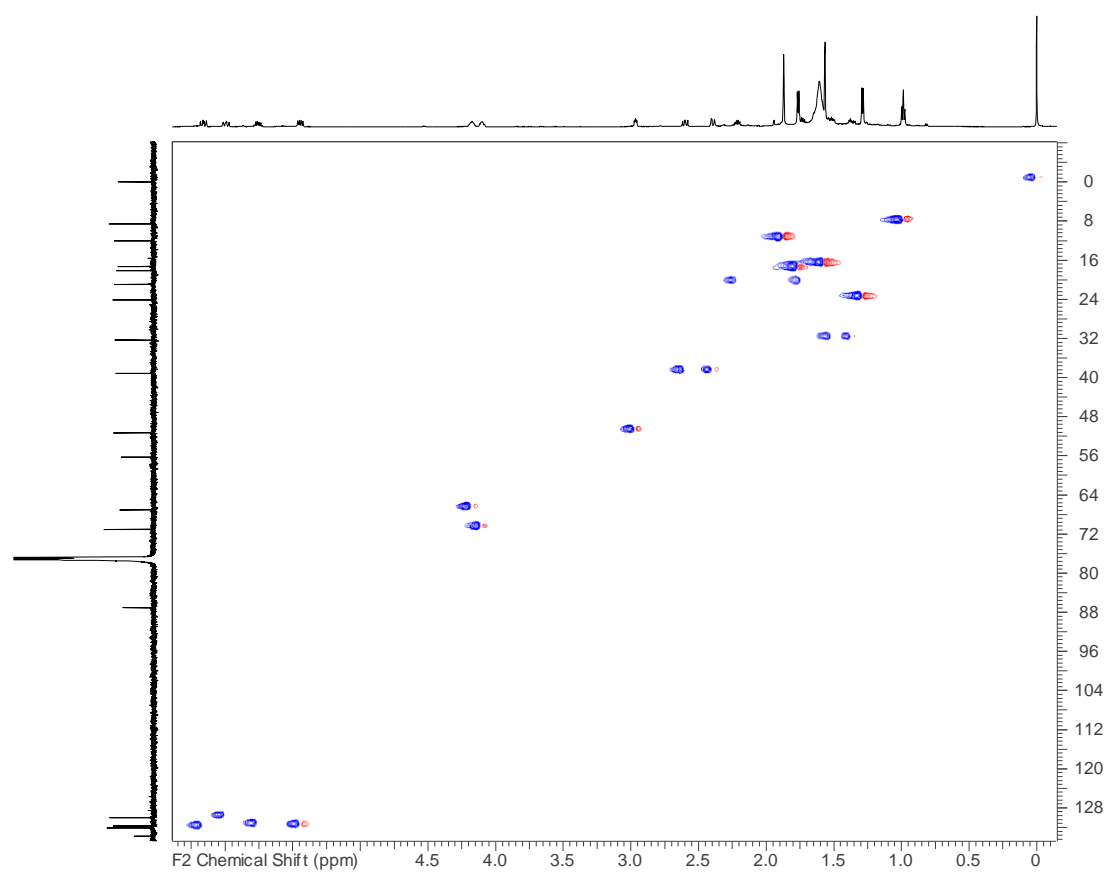

**Figure S13** HSQC spectrum of compound **2**

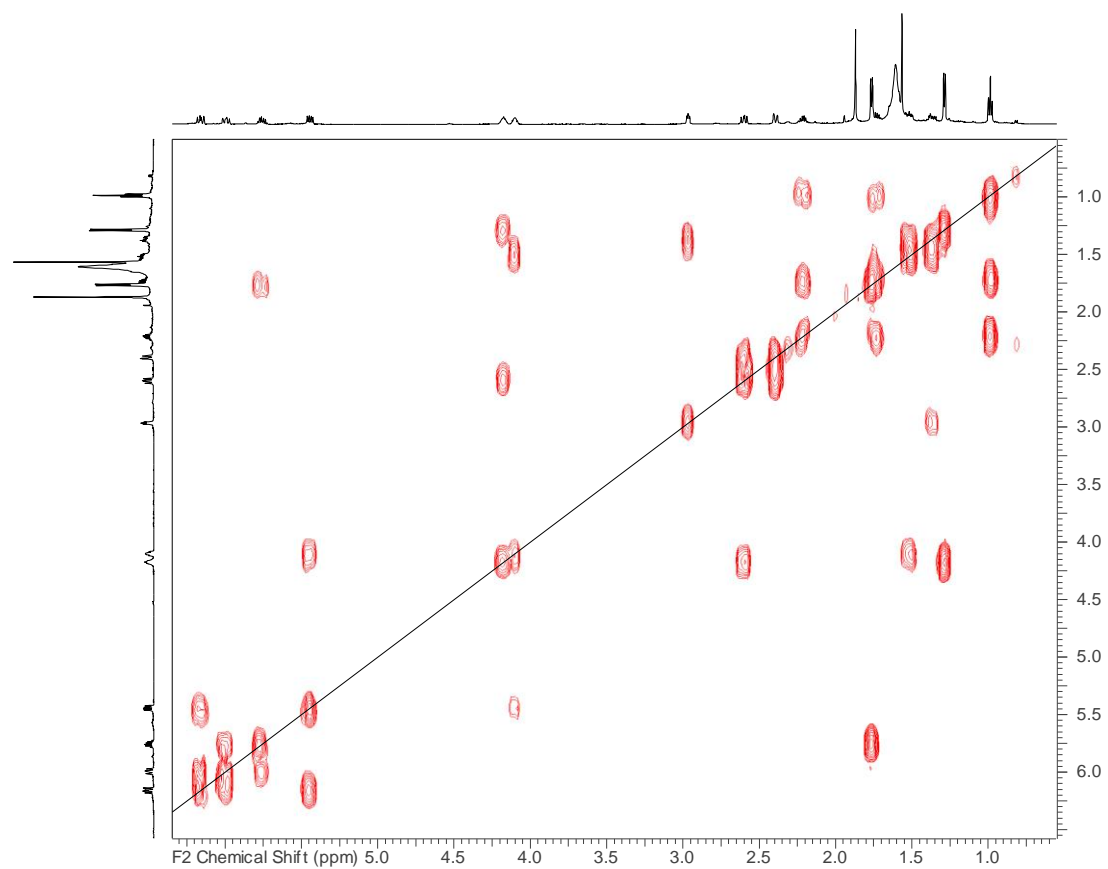

**Figure S14** COSY spectrum of compound **2**



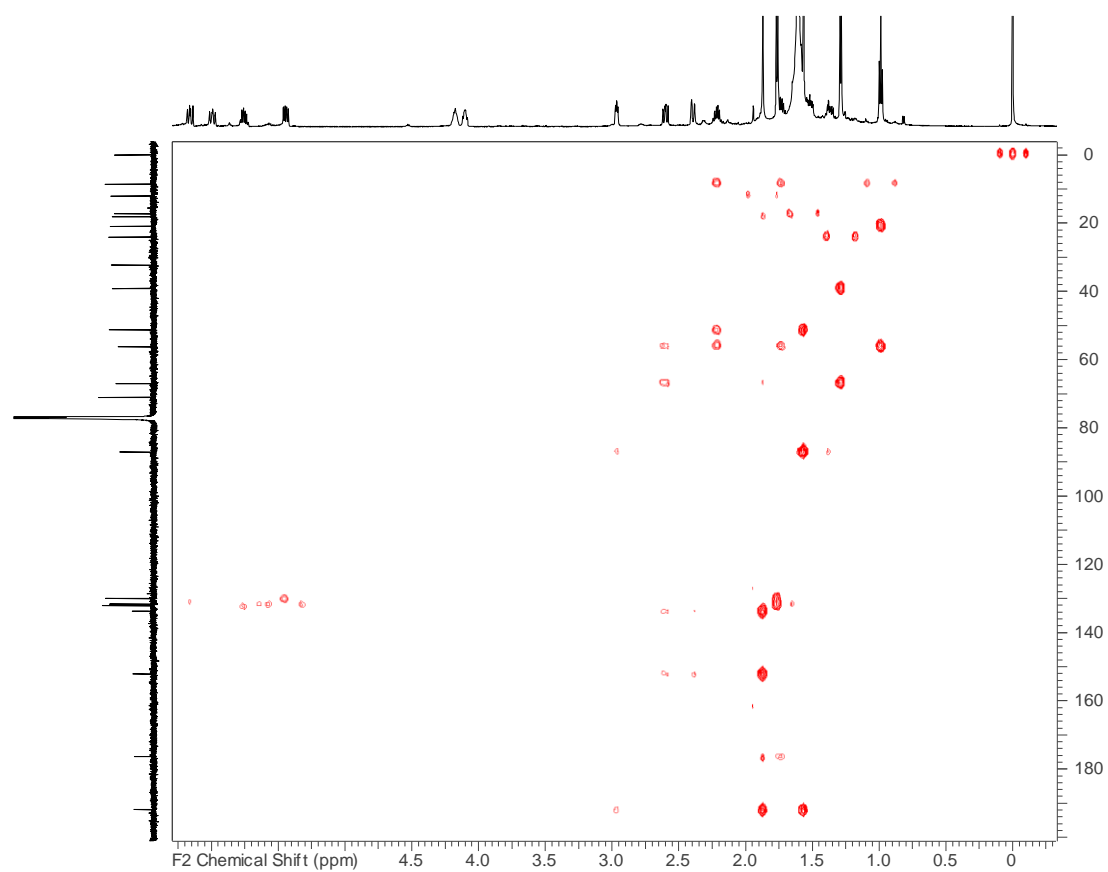

**Figure S15** HMBC spectrum of compound **2**

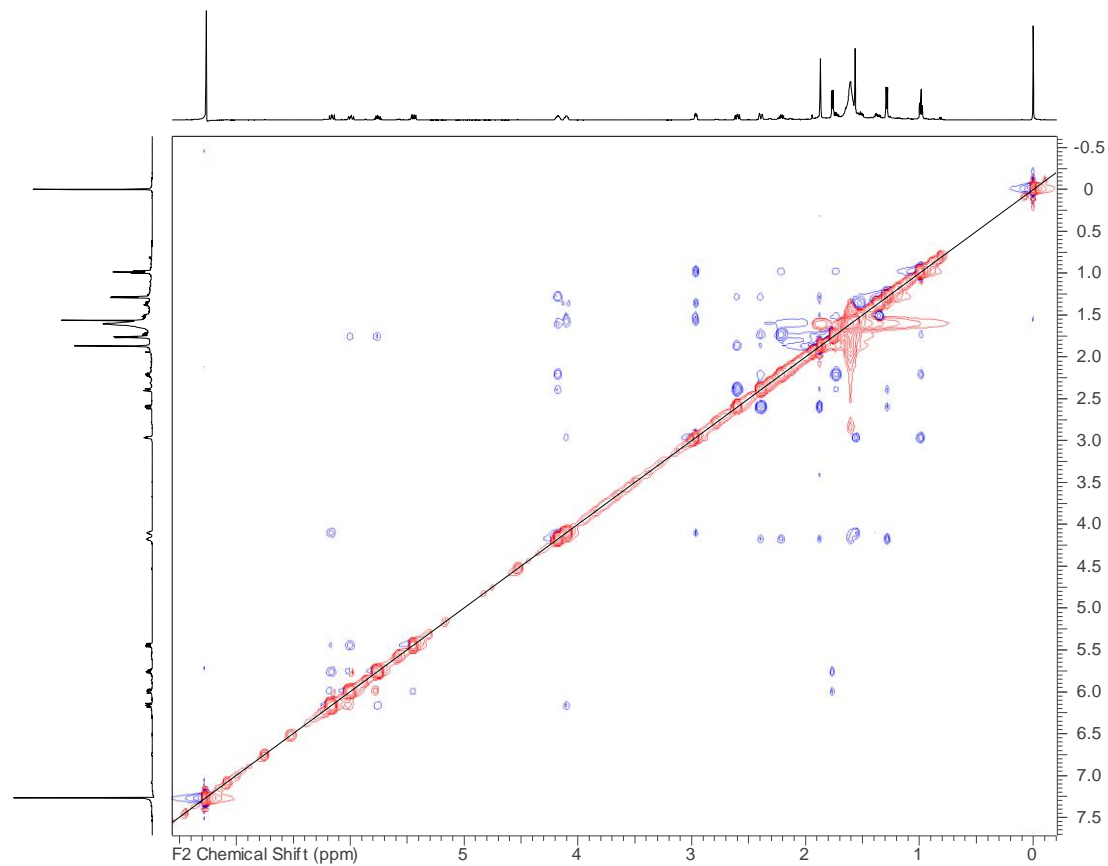

**Figure S16** NOESY spectrum of compound **2**

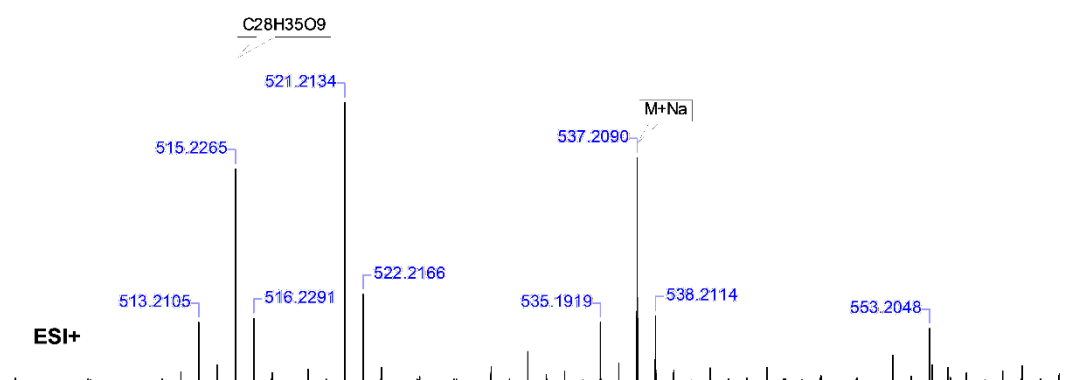

Figure S17 HR-ESI-MS spectra of compound **3**

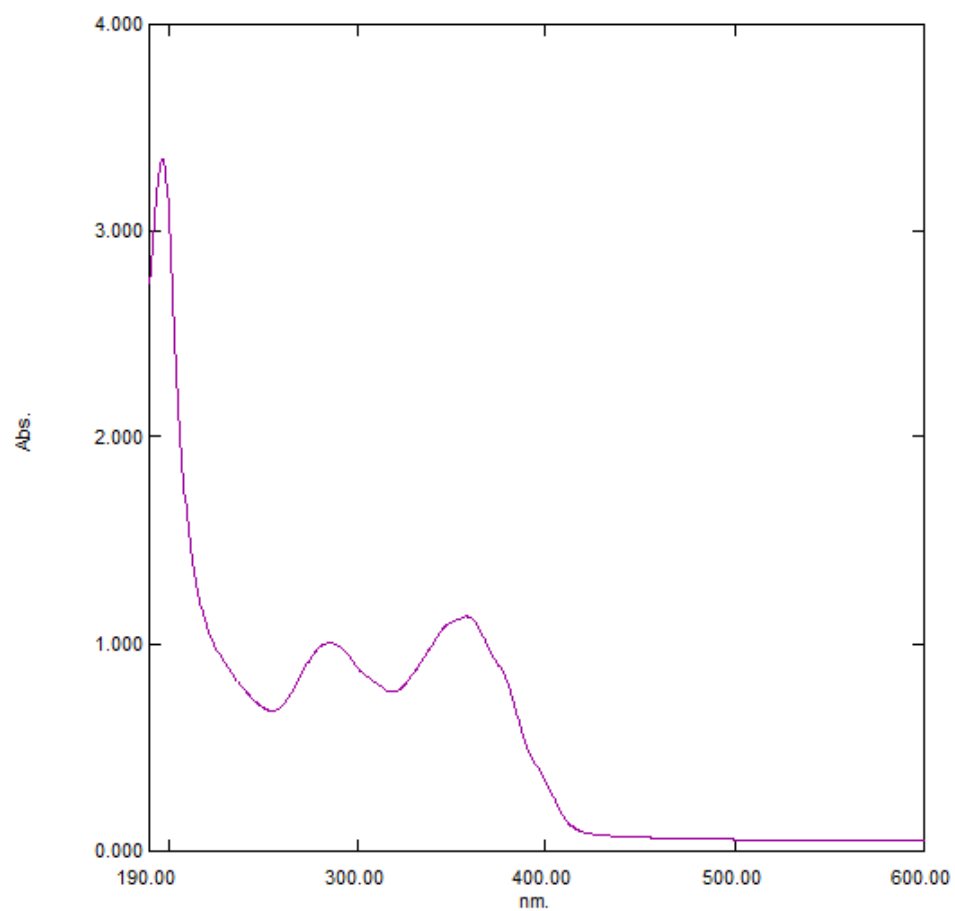

Figure S18 UV spectrum of compound **3**

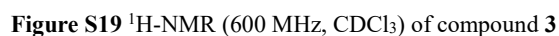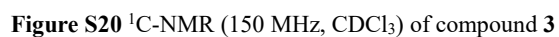

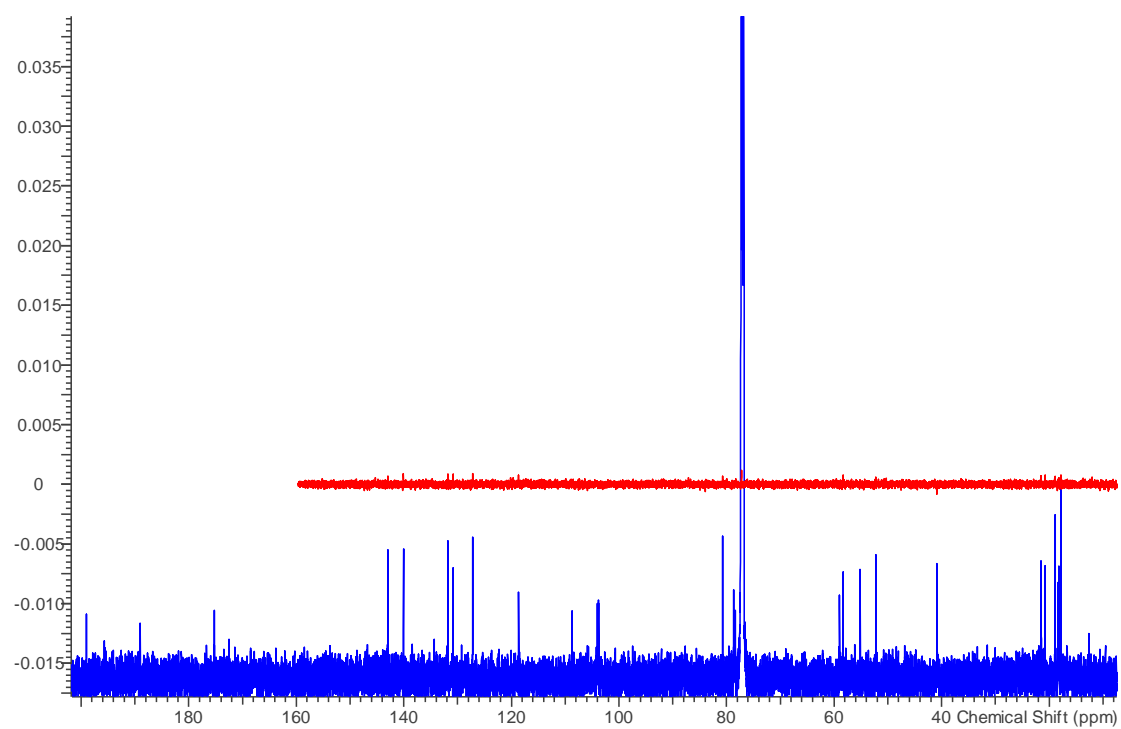

**Figure S21** DEPT of compound **3**

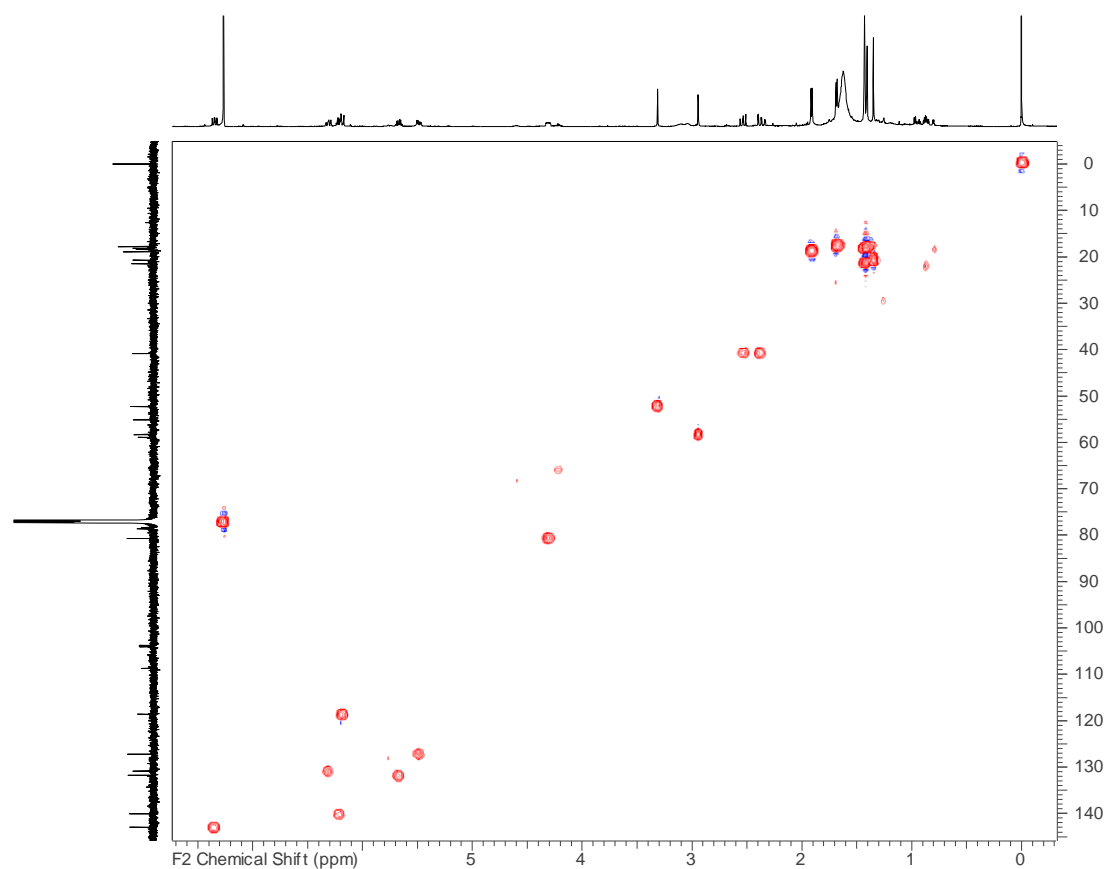

**Figure S22** HSQC spectrum of compound **3**

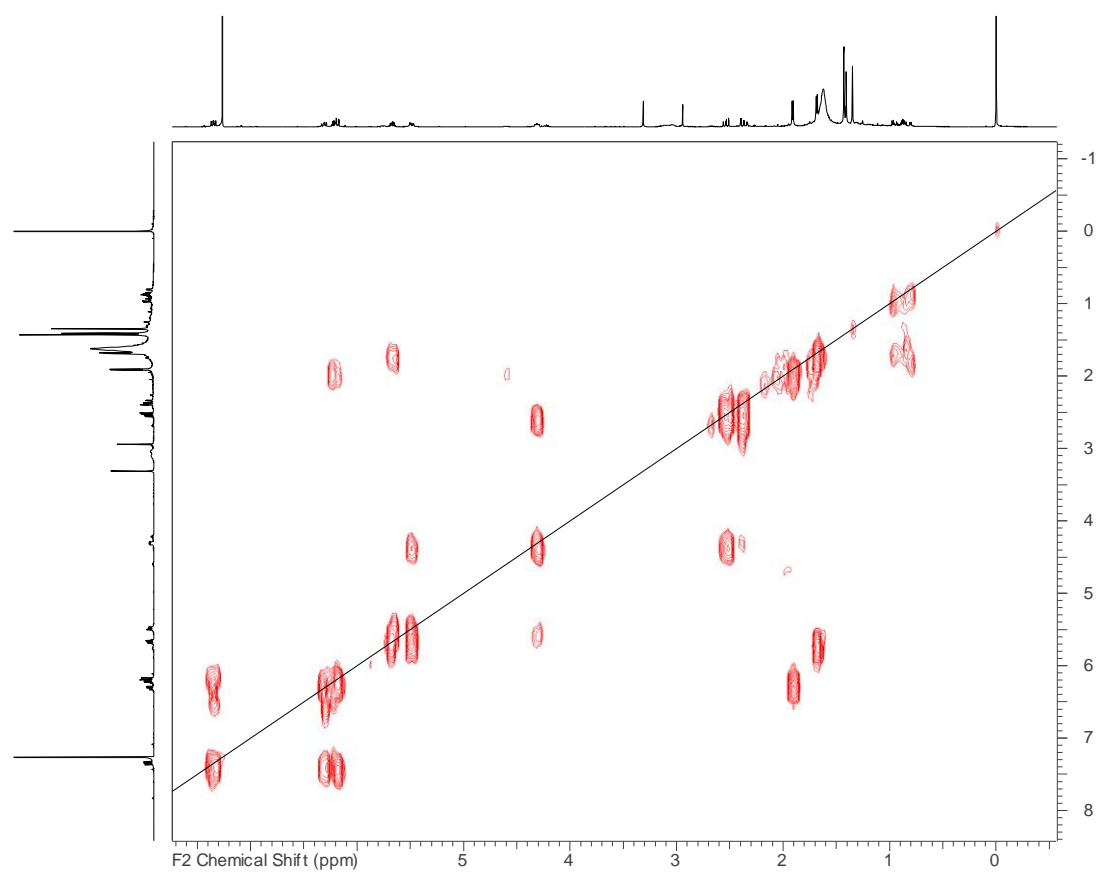

**Figure S23** COSY spectrum of compound **3**

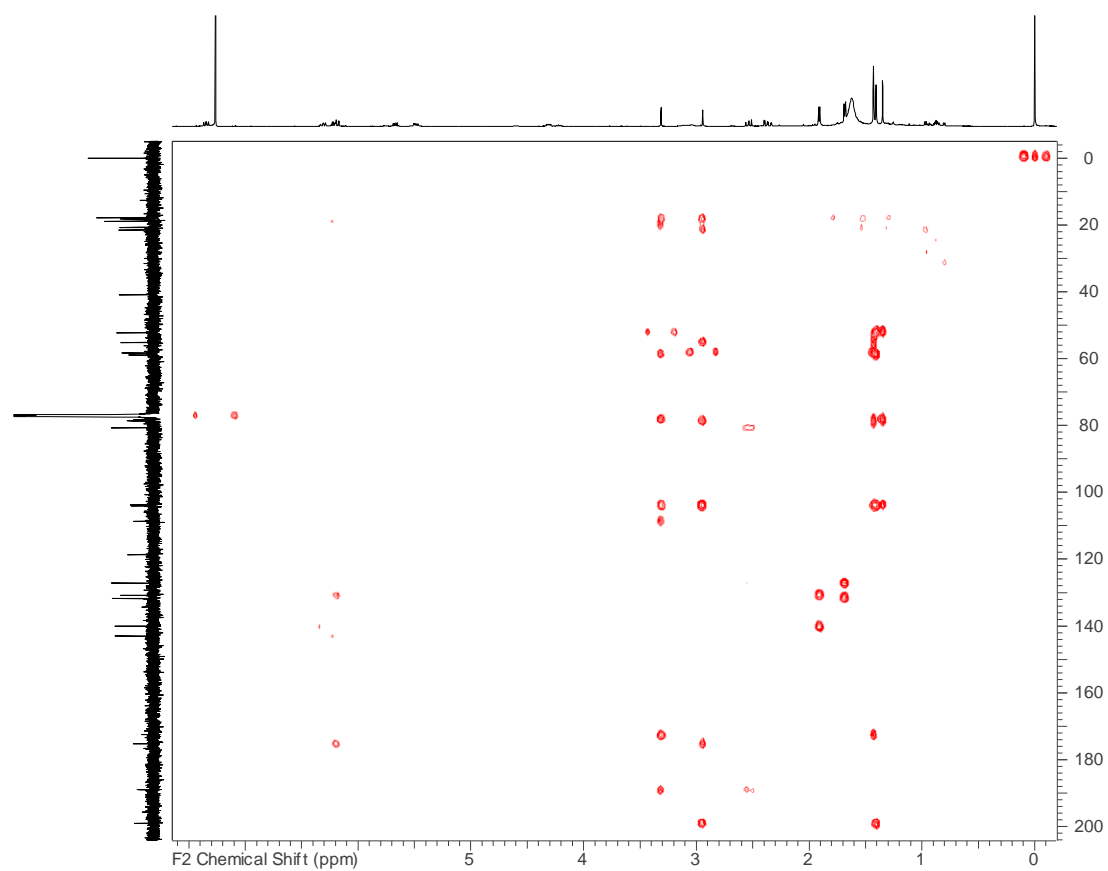

**Figure S24** HMBC spectrum of compound **3**

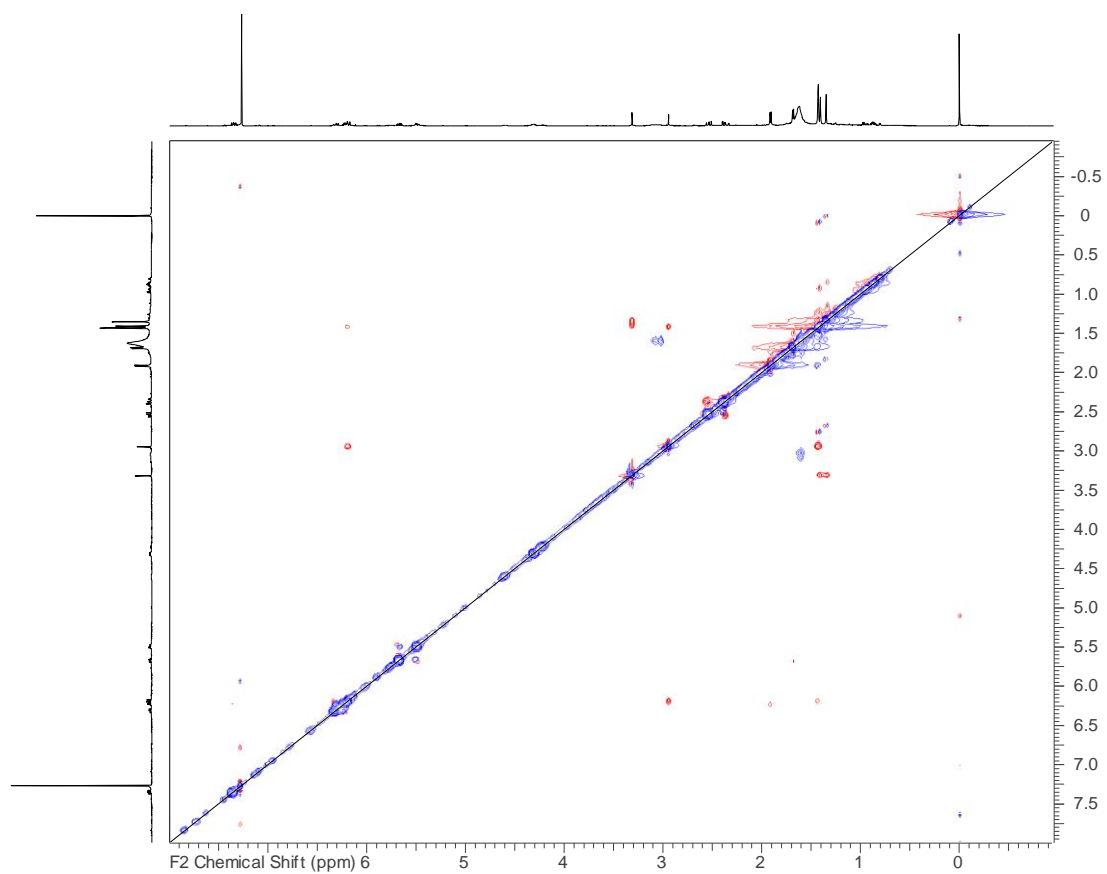

**Figure S25** NOESY spectrum of compound **3**

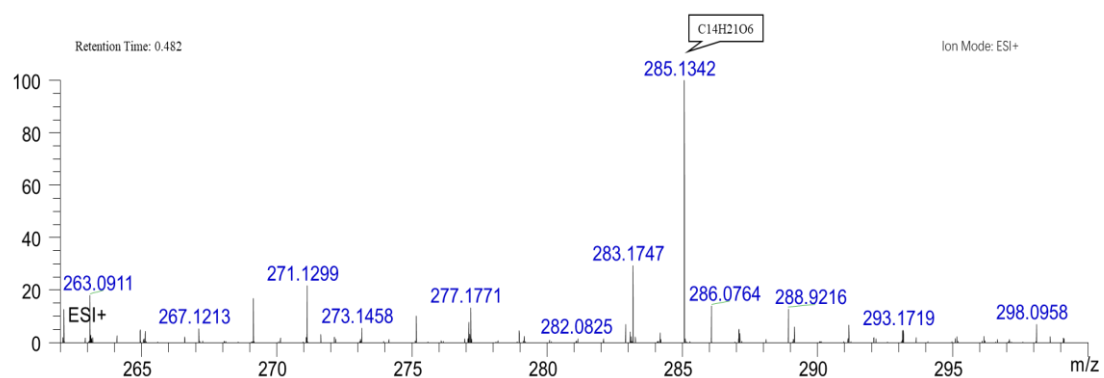

**Figure S26** HR-ESI-MS spectra of compound **4**

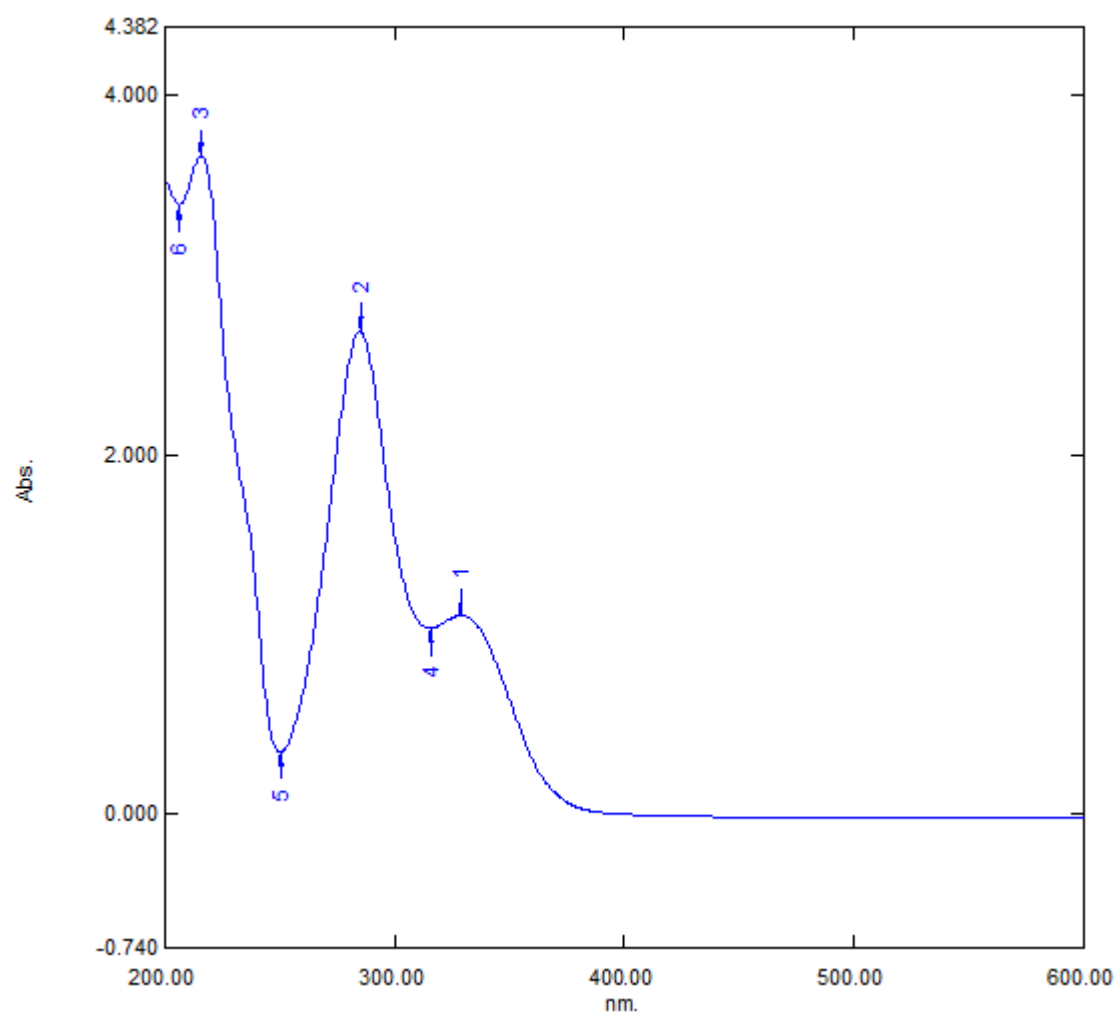

**Figure S27** UV spectrum of compound **4**

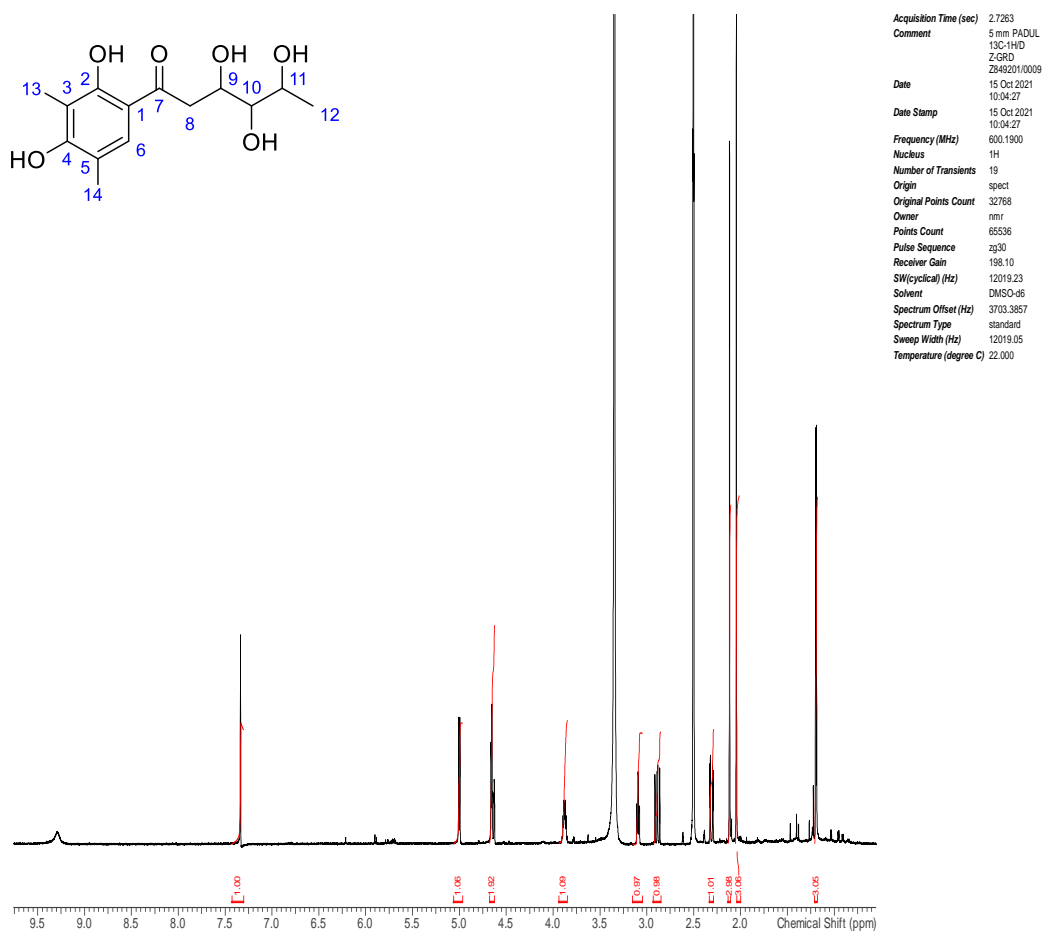

**Figure S28**  $^1\text{H}$ -NMR (150 MHz,  $\text{DMSO}-d_6$ ) of compound **4**

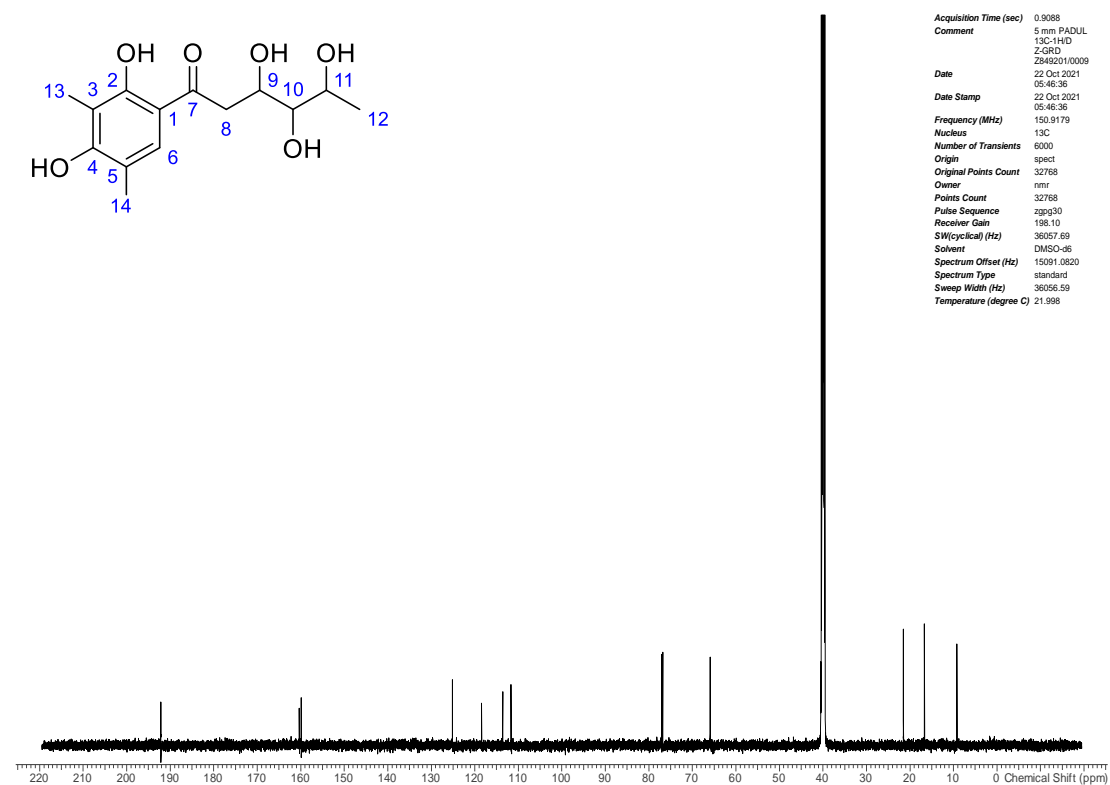

**Figure S29**  $^{13}\text{C}$ -NMR (600 MHz,  $\text{DMSO}-d_6$ ) of compound **4**



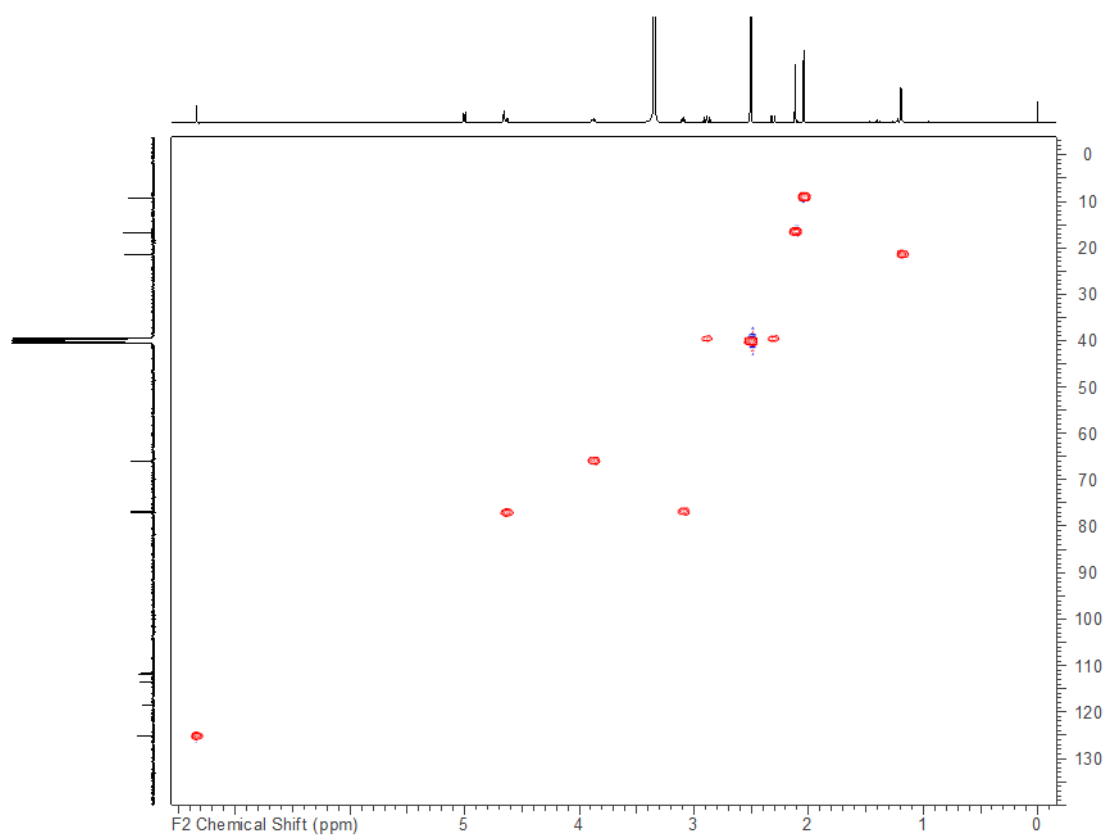

**Figure S30** HSQC spectrum of compound **4**

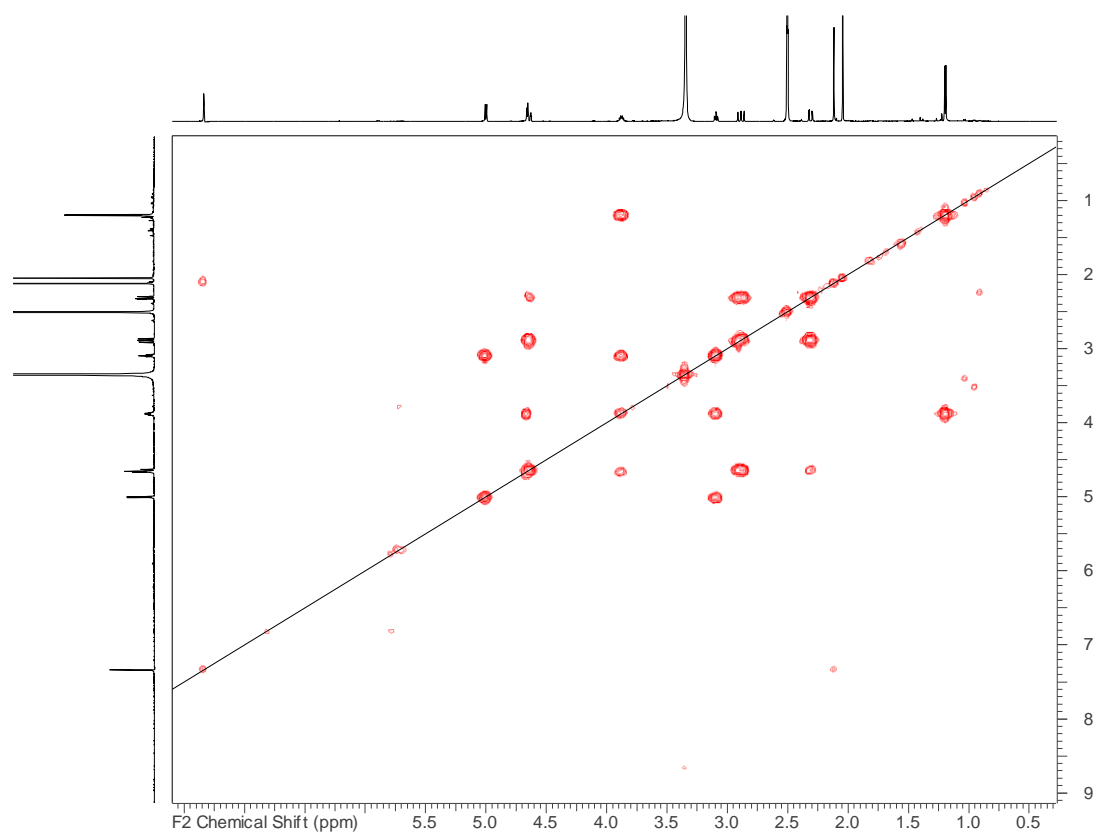

**Figure S31** COSY spectrum of compound **4**

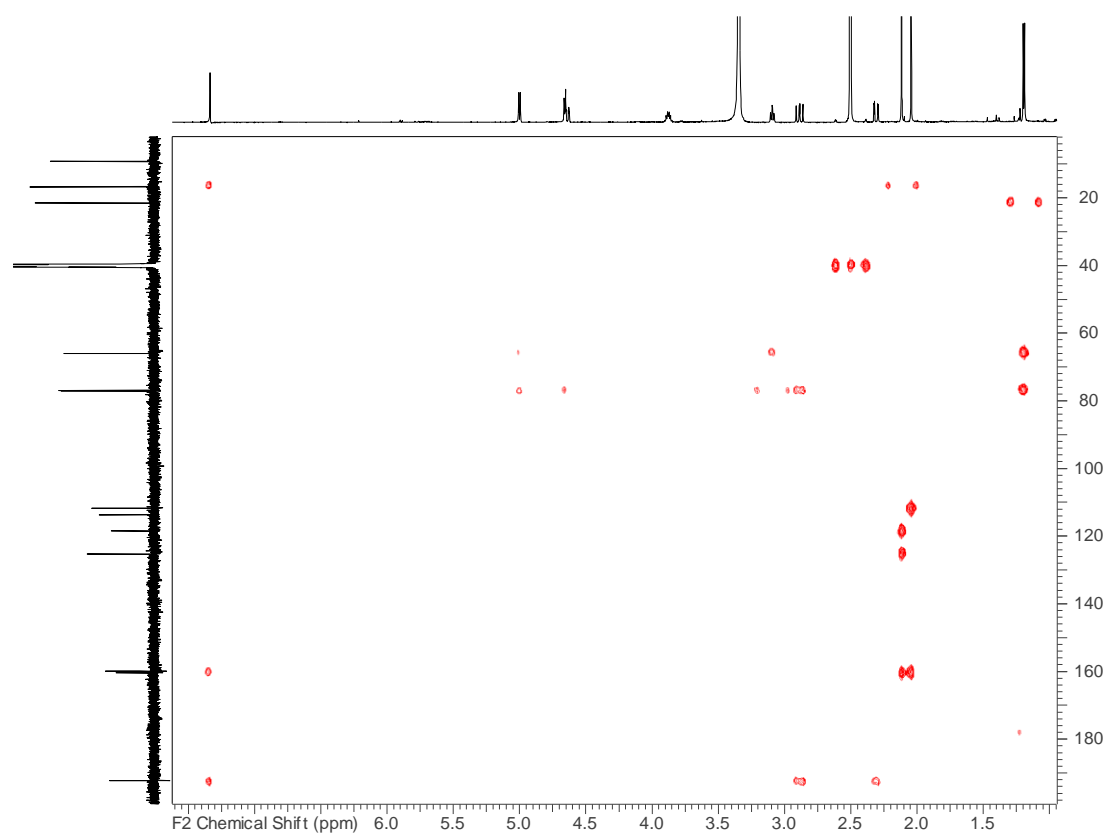

**Figure S32** HMBC spectrum of compound **4**

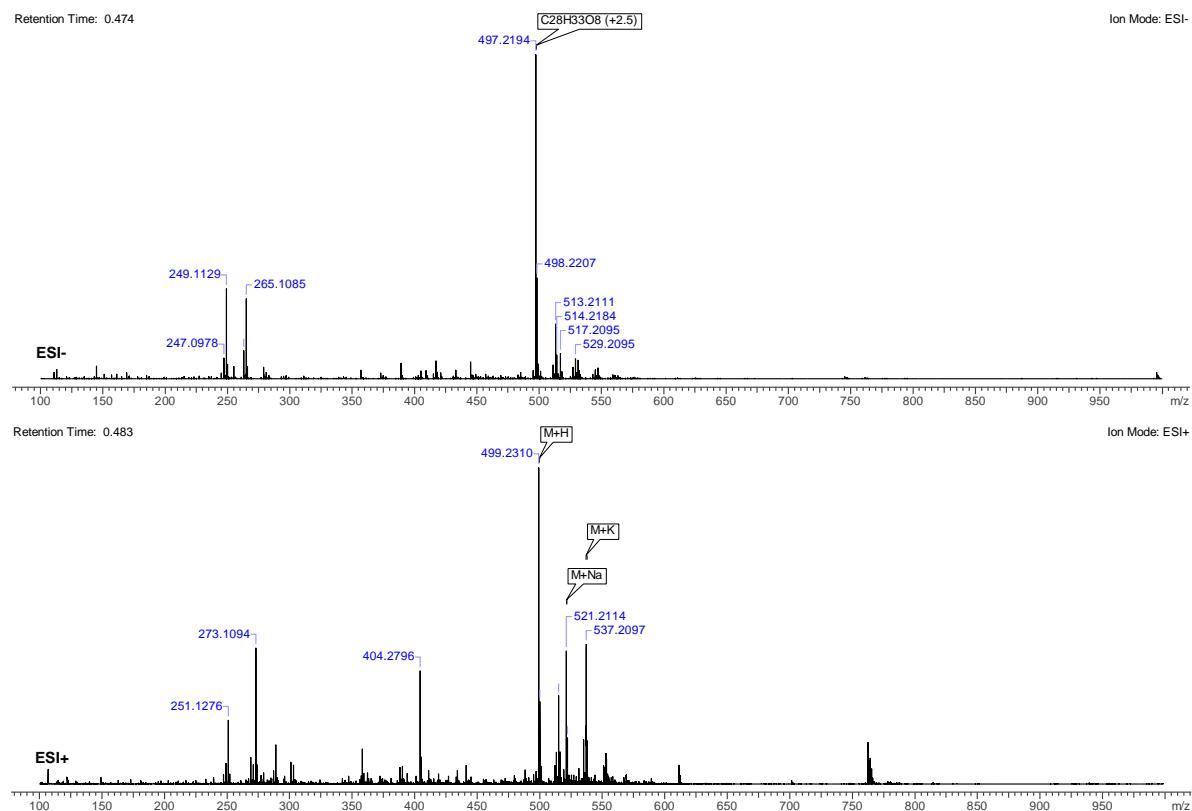

**Figure S33** HR-ESI-MS spectra of compound **5**

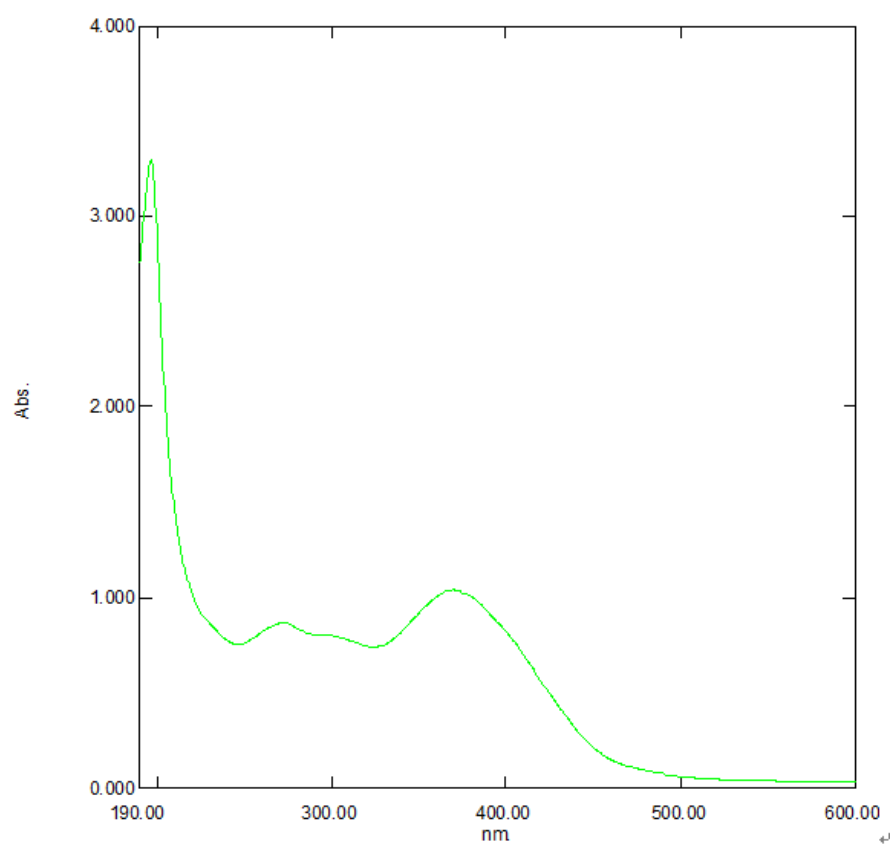

**Figure S34** UV spectrum of compound **5**

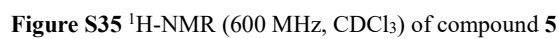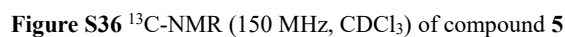

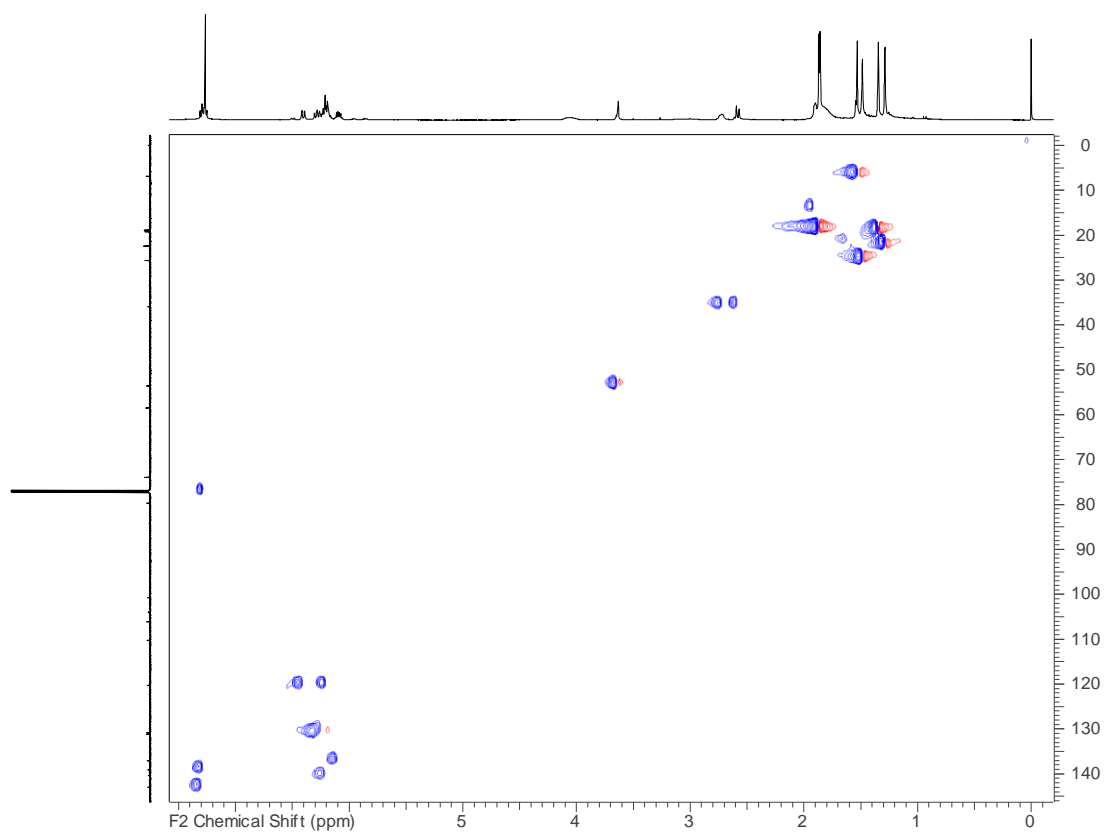

**Figure S37.** HSQC spectrum of compound **5**

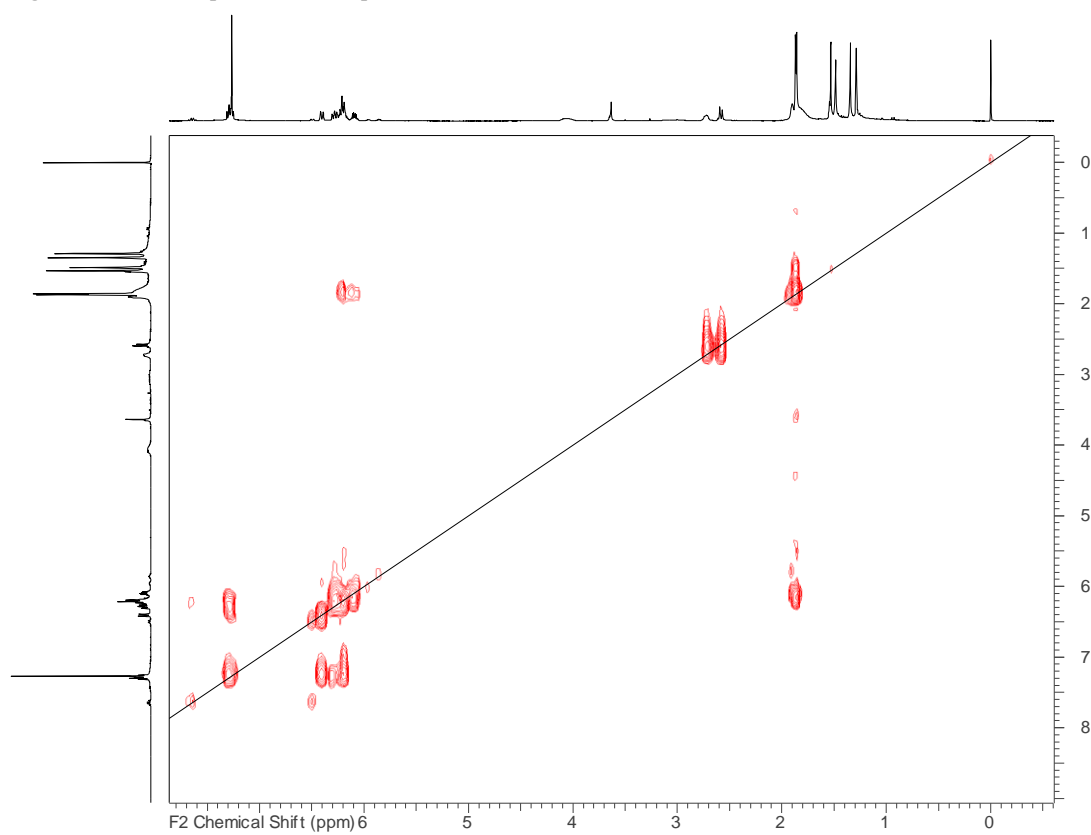

**Figure S38.** COSY spectrum of compound **5**

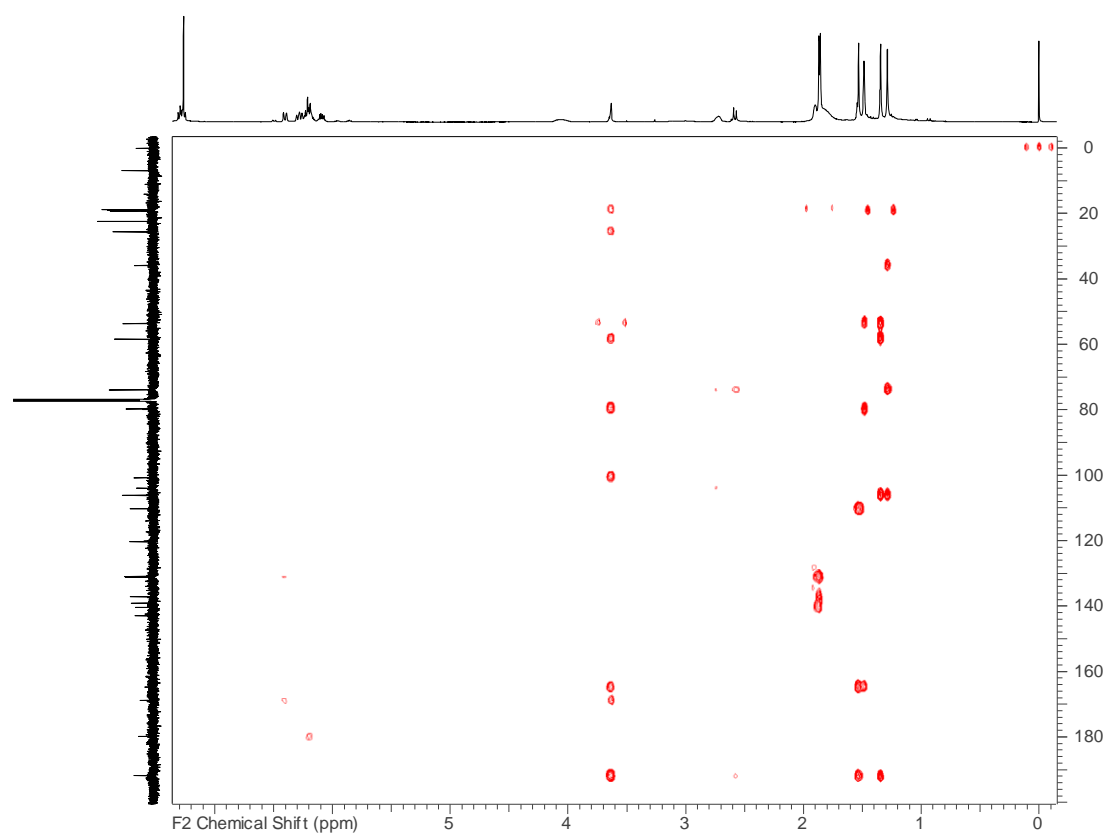

Figure S39 HMBC spectrum of compound 5

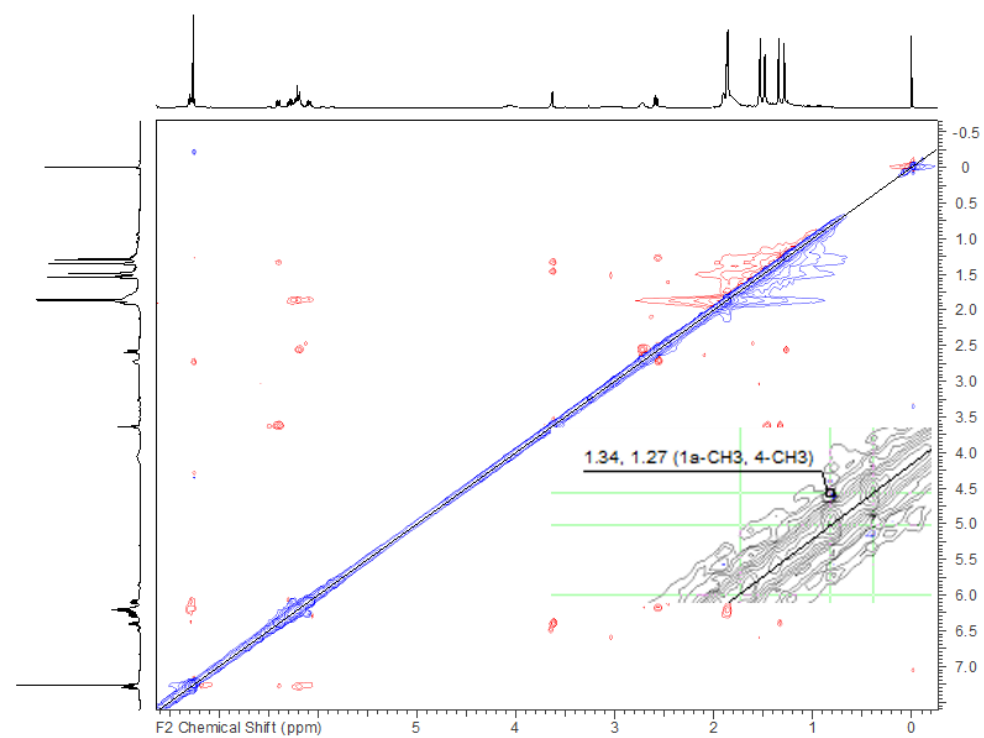

Figure S40 NOESY spectrum of compound 5

# ECD calculation of compound **1**

The conformational analysis of compound **1** was carried out by MOE 2018 using MMFF94s with an energy cutoff of 7kcal/mol. The obtained conformers were optimized using Gaussian09 at b3lyp/6-31+G(d) level in gas phase. The optimized 4 stable conformers were further subjected to ECD calculations at cam-b3lyp/6-31+g(d) level with the PCM solvation model of methanol with the first 10 electronic excitations. The overall theoretical ECD spectra were produced by SpecDis 1.70 software.

Table S1. Energy data of optimized conformers of **1**.

| conformer | Energy (Hartree) | Energy (kcal/mol) | Population (%) |
|-----------|------------------|-------------------|----------------|
| 1         | -1266.650249     | -794835.025       | 22.28          |
| 2         | -1266.65028      | -794835.0444      | 23.02          |
| 3         | -1266.650281     | -794835.0452      | 23.06          |
| 4         | -1266.65058      | -794835.2327      | 31.64          |

Table S2. Standard orientations at cam-b3lyp/6-31 level in methanol.

## Conformer 1-1

| Center Number | Atomic Number | Atomic Type | Coordinates (Angstroms) |           |           |
|---------------|---------------|-------------|-------------------------|-----------|-----------|
|               |               |             | X                       | Y         | Z         |
| 1             | 8             | 0           | 1.161624                | 1.917586  | 1.556524  |
| 2             | 6             | 0           | 1.768470                | 0.806938  | 2.044728  |
| 3             | 6             | 0           | 1.755153                | -0.287631 | 0.952679  |
| 4             | 6             | 0           | 3.011584                | 0.028736  | 0.103270  |
| 5             | 6             | 0           | 3.030108                | 1.123291  | -0.703397 |
| 6             | 6             | 0           | 1.839728                | 2.009489  | -0.769108 |
| 7             | 6             | 0           | 0.674152                | 1.667926  | 0.182946  |
| 8             | 6             | 0           | 4.197410                | 1.535959  | -1.563510 |
| 9             | 1             | 0           | 4.150117                | 1.042063  | -2.542240 |
| 10            | 1             | 0           | 5.160785                | 1.282181  | -1.109368 |
| 11            | 1             | 0           | 4.169199                | 2.613514  | -1.742035 |
| 12            | 8             | 0           | 1.782014                | 2.973484  | -1.518049 |
| 13            | 6             | 0           | -0.523221               | 2.566446  | -0.045248 |
| 14            | 1             | 0           | -1.304984               | 2.368290  | 0.693321  |
| 15            | 1             | 0           | -0.926956               | 2.409623  | -1.048461 |
| 16            | 1             | 0           | -0.220568               | 3.612877  | 0.039291  |
| 17            | 6             | 0           | 1.716236                | -1.687426 | 1.591803  |
| 18            | 1             | 0           | 2.601940                | -1.815298 | 2.222692  |
| 19            | 1             | 0           | 0.882970                | -1.708691 | 2.303015  |
| 20            | 6             | 0           | 6.074946                | -2.224280 | -0.916131 |
| 21            | 1             | 0           | 6.195792                | -2.967208 | -1.707553 |
| 22            | 1             | 0           | 6.279162                | -2.677996 | 0.061210  |
| 23            | 1             | 0           | 6.816447                | -1.427021 | -1.061255 |
| 24            | 6             | 0           | 4.678937                | -1.631767 | -0.972411 |
| 25            | 6             | 0           | 4.264185                | -0.805894 | 0.255813  |
| 26            | 1             | 0           | 4.188820                | -1.510655 | 1.090215  |
| 27            | 1             | 0           | 5.113290                | -0.158527 | 0.517160  |

|    |   |   |           |           |           |
|----|---|---|-----------|-----------|-----------|
| 28 | 6 | 0 | 1.580747  | -2.856161 | 0.606092  |
| 29 | 1 | 0 | 2.385030  | -2.876422 | -0.134048 |
| 30 | 1 | 0 | 0.641447  | -2.809996 | 0.043227  |
| 31 | 1 | 0 | 1.593579  | -3.808943 | 1.148115  |
| 32 | 8 | 0 | 3.942640  | -1.807406 | -1.923846 |
| 33 | 8 | 0 | 2.236118  | 0.743737  | 3.155499  |
| 34 | 6 | 0 | 0.479636  | 0.130838  | 0.150356  |
| 35 | 1 | 0 | 0.531563  | -0.235224 | -0.878822 |
| 36 | 6 | 0 | -0.855312 | -0.321331 | 0.760172  |
| 37 | 1 | 0 | -1.090503 | 0.222456  | 1.683849  |
| 38 | 1 | 0 | -0.802811 | -1.379248 | 1.050428  |
| 39 | 6 | 0 | -2.036745 | -0.241246 | -0.209355 |
| 40 | 6 | 0 | -3.385346 | -0.247814 | 0.402859  |
| 41 | 1 | 0 | -3.450863 | -0.268554 | 1.489979  |
| 42 | 6 | 0 | -4.507045 | -0.221429 | -0.352421 |
| 43 | 1 | 0 | -4.386888 | -0.195947 | -1.435481 |
| 44 | 6 | 0 | -5.856024 | -0.218335 | 0.174840  |
| 45 | 1 | 0 | -5.968678 | -0.250052 | 1.259981  |
| 46 | 6 | 0 | -6.956771 | -0.164944 | -0.603324 |
| 47 | 1 | 0 | -6.852564 | -0.140491 | -1.688815 |
| 48 | 8 | 0 | -1.866157 | -0.220219 | -1.423460 |
| 49 | 6 | 0 | -8.364289 | -0.152424 | -0.083524 |
| 50 | 1 | 0 | -8.870990 | 0.774436  | -0.375872 |
| 51 | 1 | 0 | -8.372953 | -0.206805 | 1.015325  |
| 52 | 8 | 0 | -9.159741 | -1.193902 | -0.658494 |
| 53 | 1 | 0 | -8.752615 | -2.048243 | -0.442020 |

Conformer 1-2

| Center<br>Number | Atomic<br>Number | Atomic<br>Type | Coordinates (Angstroms) |           |           |
|------------------|------------------|----------------|-------------------------|-----------|-----------|
|                  |                  |                | X                       | Y         | Z         |
| 1                | 8                | 0              | 1.078997                | 1.797506  | 1.673820  |
| 2                | 6                | 0              | 1.731333                | 0.684466  | 2.093209  |
| 3                | 6                | 0              | 1.767014                | -0.337486 | 0.933335  |
| 4                | 6                | 0              | 3.008798                | 0.085635  | 0.109666  |
| 5                | 6                | 0              | 2.982483                | 1.229533  | -0.624891 |
| 6                | 6                | 0              | 1.755531                | 2.067081  | -0.637955 |
| 7                | 6                | 0              | 0.604027                | 1.614920  | 0.285301  |
| 8                | 6                | 0              | 4.135526                | 1.744010  | -1.448956 |
| 9                | 1                | 0              | 4.148892                | 1.267527  | -2.437124 |
| 10               | 1                | 0              | 5.103776                | 1.552258  | -0.973927 |
| 11               | 1                | 0              | 4.032261                | 2.820084  | -1.606050 |
| 12               | 8                | 0              | 1.657444                | 3.075137  | -1.321820 |
| 13               | 6                | 0              | -0.630699               | 2.474183  | 0.109954  |
| 14               | 1                | 0              | -1.029426               | 2.359660  | -0.900952 |
| 15               | 1                | 0              | -0.372139               | 3.525569  | 0.256267  |
| 16               | 1                | 0              | -1.402002               | 2.200063  | 0.835178  |



|    |   |   |           |           |           |
|----|---|---|-----------|-----------|-----------|
| 17 | 6 | 0 | 1.789427  | -1.775370 | 1.482333  |
| 18 | 1 | 0 | 2.681655  | -1.904639 | 2.103547  |
| 19 | 1 | 0 | 0.960122  | -1.876405 | 2.191414  |
| 20 | 6 | 0 | 6.168983  | -1.961235 | -1.041813 |
| 21 | 1 | 0 | 6.875633  | -1.125680 | -1.136878 |
| 22 | 1 | 0 | 6.321825  | -2.648872 | -1.876505 |
| 23 | 1 | 0 | 6.392296  | -2.463939 | -0.093126 |
| 24 | 6 | 0 | 4.749286  | -1.425535 | -1.067062 |
| 25 | 6 | 0 | 4.295912  | -0.702698 | 0.211496  |
| 26 | 1 | 0 | 4.250571  | -1.464057 | 0.996779  |
| 27 | 1 | 0 | 5.115820  | -0.037764 | 0.518562  |
| 28 | 6 | 0 | 1.700158  | -2.884651 | 0.425614  |
| 29 | 1 | 0 | 2.505133  | -2.829024 | -0.312205 |
| 30 | 1 | 0 | 0.760046  | -2.840184 | -0.135953 |
| 31 | 1 | 0 | 1.749549  | -3.867938 | 0.907754  |
| 32 | 8 | 0 | 4.025406  | -1.565853 | -2.033727 |
| 33 | 8 | 0 | 2.198375  | 0.569938  | 3.200113  |
| 34 | 6 | 0 | 0.475212  | 0.076121  | 0.155022  |
| 35 | 1 | 0 | 0.542810  | -0.221620 | -0.895045 |
| 36 | 6 | 0 | -0.839188 | -0.469734 | 0.732029  |
| 37 | 1 | 0 | -1.100968 | 0.011901  | 1.682658  |
| 38 | 1 | 0 | -0.739512 | -1.538300 | 0.965158  |
| 39 | 6 | 0 | -2.021167 | -0.390128 | -0.236713 |
| 40 | 6 | 0 | -3.367691 | -0.517838 | 0.366640  |
| 41 | 1 | 0 | -3.432967 | -0.612088 | 1.449892  |
| 42 | 6 | 0 | -4.487653 | -0.517264 | -0.391637 |
| 43 | 1 | 0 | -4.367526 | -0.422431 | -1.470854 |
| 44 | 6 | 0 | -5.834758 | -0.632304 | 0.127728  |
| 45 | 1 | 0 | -5.947776 | -0.713202 | 1.210271  |
| 46 | 6 | 0 | -6.933148 | -0.651848 | -0.655310 |
| 47 | 1 | 0 | -6.829100 | -0.563029 | -1.737477 |
| 48 | 8 | 0 | -1.850661 | -0.273969 | -1.445422 |
| 49 | 6 | 0 | -8.338794 | -0.771046 | -0.143735 |
| 50 | 1 | 0 | -8.348839 | -0.823876 | 0.955195  |
| 51 | 1 | 0 | -8.808550 | -1.684449 | -0.526331 |
| 52 | 8 | 0 | -9.174998 | 0.288955  | -0.617601 |
| 53 | 1 | 0 | -8.801640 | 1.133850  | -0.318661 |

Conformer 1-3

| Center<br>Number | Atomic<br>Number | Atomic<br>Type | Coordinates (Angstroms) |           |           |
|------------------|------------------|----------------|-------------------------|-----------|-----------|
|                  |                  |                | X                       | Y         | Z         |
| 1                | 8                | 0              | 1.078807                | 1.797069  | 1.674077  |
| 2                | 6                | 0              | 1.731305                | 0.684038  | 2.093281  |
| 3                | 6                | 0              | 1.767056                | -0.337728 | 0.933247  |
| 4                | 6                | 0              | 3.008790                | 0.085654  | 0.109631  |
| 5                | 6                | 0              | 2.982307                | 1.229640  | -0.624776 |

|    |   |   |           |           |           |
|----|---|---|-----------|-----------|-----------|
| 6  | 6 | 0 | 1.755270  | 2.067064  | -0.637668 |
| 7  | 6 | 0 | 0.603841  | 1.614654  | 0.285568  |
| 8  | 6 | 0 | 4.135254  | 1.744411  | -1.448781 |
| 9  | 1 | 0 | 5.103657  | 1.551008  | -0.974761 |
| 10 | 1 | 0 | 4.032852  | 2.820832  | -1.604126 |
| 11 | 1 | 0 | 4.147474  | 1.269520  | -2.437729 |
| 12 | 8 | 0 | 1.657075  | 3.075224  | -1.321366 |
| 13 | 6 | 0 | -0.630985 | 2.473802  | 0.110349  |
| 14 | 1 | 0 | -1.029732 | 2.359348  | -0.900556 |
| 15 | 1 | 0 | -0.372534 | 3.525200  | 0.256771  |
| 16 | 1 | 0 | -1.402234 | 2.199516  | 0.835569  |
| 17 | 6 | 0 | 1.789602  | -1.775701 | 1.482009  |
| 18 | 1 | 0 | 2.681829  | -1.905003 | 2.103217  |
| 19 | 1 | 0 | 0.960289  | -1.876928 | 2.191054  |
| 20 | 6 | 0 | 6.169602  | -1.960055 | -1.042127 |
| 21 | 1 | 0 | 6.322995  | -2.646895 | -1.877366 |
| 22 | 1 | 0 | 6.392768  | -2.463525 | -0.093803 |
| 23 | 1 | 0 | 6.875974  | -1.124145 | -1.136128 |
| 24 | 6 | 0 | 4.749697  | -1.424951 | -1.067276 |
| 25 | 6 | 0 | 4.296030  | -0.702498 | 0.211433  |
| 26 | 1 | 0 | 4.250650  | -1.464095 | 0.996480  |
| 27 | 1 | 0 | 5.115745  | -0.037499 | 0.518859  |
| 28 | 6 | 0 | 1.700465  | -2.884797 | 0.425086  |
| 29 | 1 | 0 | 1.749762  | -3.868171 | 0.907063  |
| 30 | 1 | 0 | 2.505560  | -2.829058 | -0.312594 |
| 31 | 1 | 0 | 0.760442  | -2.840214 | -0.136622 |
| 32 | 8 | 0 | 4.025803  | -1.565448 | -2.033901 |
| 33 | 8 | 0 | 2.198415  | 0.569432  | 3.200144  |
| 34 | 6 | 0 | 0.475201  | 0.075858  | 0.155028  |
| 35 | 1 | 0 | 0.542798  | -0.221712 | -0.895086 |
| 36 | 6 | 0 | -0.839130 | -0.470248 | 0.731973  |
| 37 | 1 | 0 | -1.100853 | 0.011052  | 1.682783  |
| 38 | 1 | 0 | -0.739360 | -1.538891 | 0.964715  |
| 39 | 6 | 0 | -2.021171 | -0.390406 | -0.236682 |
| 40 | 6 | 0 | -3.367690 | -0.517789 | 0.366740  |
| 41 | 1 | 0 | -3.432944 | -0.611822 | 1.450012  |
| 42 | 6 | 0 | -4.487677 | -0.517235 | -0.391505 |
| 43 | 1 | 0 | -4.367564 | -0.422621 | -1.470743 |
| 44 | 6 | 0 | -5.834787 | -0.632009 | 0.127900  |
| 45 | 1 | 0 | -5.947812 | -0.712663 | 1.210461  |
| 46 | 6 | 0 | -6.933172 | -0.651579 | -0.655141 |
| 47 | 1 | 0 | -6.829122 | -0.562957 | -1.737325 |
| 48 | 8 | 0 | -1.850694 | -0.274360 | -1.445410 |
| 49 | 6 | 0 | -8.338857 | -0.770642 | -0.143621 |
| 50 | 1 | 0 | -8.349000 | -0.822673 | 0.955348  |

|    |   |   |           |           |           |
|----|---|---|-----------|-----------|-----------|
| 51 | 1 | 0 | -8.808394 | -1.684434 | -0.525570 |
| 52 | 8 | 0 | -9.175208 | 0.288827  | -0.618374 |
| 53 | 1 | 0 | -8.802540 | 1.133979  | -0.319305 |

Conformer 1-4

| Center<br>Number | Atomic<br>Number | Atomic<br>Type | Coordinates (Angstroms) |           |           |
|------------------|------------------|----------------|-------------------------|-----------|-----------|
|                  |                  |                | X                       | Y         | Z         |
| 1                | 8                | 0              | 1.051089                | 1.797495  | 1.673863  |
| 2                | 6                | 0              | 1.648694                | 0.657962  | 2.102066  |
| 3                | 6                | 0              | 1.692804                | -0.350900 | 0.931086  |
| 4                | 6                | 0              | 2.978902                | 0.038670  | 0.160502  |
| 5                | 6                | 0              | 3.019270                | 1.191663  | -0.559233 |
| 6                | 6                | 0              | 1.823326                | 2.072043  | -0.606335 |
| 7                | 6                | 0              | 0.622799                | 1.648580  | 0.265963  |
| 8                | 6                | 0              | 4.219534                | 1.675367  | -1.333180 |
| 9                | 1                | 0              | 5.162329                | 1.446343  | -0.824415 |
| 10               | 1                | 0              | 4.158147                | 2.755886  | -1.481544 |
| 11               | 1                | 0              | 4.254574                | 1.208895  | -2.325608 |
| 12               | 8                | 0              | 1.787110                | 3.091742  | -1.279181 |
| 13               | 6                | 0              | -0.574519               | 2.551780  | 0.056272  |
| 14               | 1                | 0              | -0.287293               | 3.591407  | 0.230900  |
| 15               | 1                | 0              | -1.383370               | 2.292004  | 0.744673  |
| 16               | 1                | 0              | -0.935510               | 2.466300  | -0.971494 |
| 17               | 6                | 0              | 1.645200                | -1.794895 | 1.462193  |
| 18               | 1                | 0              | 2.508406                | -1.962098 | 2.114688  |
| 19               | 1                | 0              | 0.786677                | -1.875716 | 2.138265  |
| 20               | 6                | 0              | 6.108357                | -2.107855 | -0.892086 |
| 21               | 1                | 0              | 6.271717                | -2.632612 | 0.056919  |
| 22               | 1                | 0              | 6.849393                | -1.298702 | -0.943552 |
| 23               | 1                | 0              | 6.270763                | -2.788731 | -1.730522 |
| 24               | 6                | 0              | 4.711865                | -1.518038 | -0.968481 |
| 25               | 6                | 0              | 4.233326                | -0.794995 | 0.300386  |
| 26               | 1                | 0              | 4.131413                | -1.563928 | 1.072932  |
| 27               | 1                | 0              | 5.063157                | -0.163426 | 0.648492  |
| 28               | 6                | 0              | 1.558236                | -2.888567 | 0.389081  |
| 29               | 1                | 0              | 2.390444                | -2.851134 | -0.319246 |
| 30               | 1                | 0              | 0.640552                | -2.807089 | -0.204431 |
| 31               | 1                | 0              | 1.558525                | -3.878365 | 0.860454  |
| 32               | 8                | 0              | 4.024724                | -1.618904 | -1.966380 |
| 33               | 8                | 0              | 2.070919                | 0.514366  | 3.223710  |
| 34               | 6                | 0              | 0.446827                | 0.116813  | 0.109565  |
| 35               | 1                | 0              | 0.545610                | -0.168941 | -0.941383 |
| 36               | 6                | 0              | -0.907418               | -0.391067 | 0.624670  |
| 37               | 1                | 0              | -1.192898               | 0.087590  | 1.569930  |
| 38               | 1                | 0              | -0.853321               | -1.465015 | 0.846875  |
| 39               | 6                | 0              | -2.044715               | -0.258616 | -0.392654 |

|    |   |   |           |           |           |
|----|---|---|-----------|-----------|-----------|
| 40 | 6 | 0 | -3.415525 | -0.361112 | 0.149640  |
| 41 | 1 | 0 | -3.530490 | -0.478139 | 1.226338  |
| 42 | 6 | 0 | -4.503537 | -0.310927 | -0.654109 |
| 43 | 1 | 0 | -4.332334 | -0.191304 | -1.724301 |
| 44 | 6 | 0 | -5.872983 | -0.402691 | -0.196481 |
| 45 | 1 | 0 | -6.055399 | -0.518613 | 0.869563  |
| 46 | 6 | 0 | -6.922735 | -0.349332 | -1.039317 |
| 47 | 1 | 0 | -6.752979 | -0.232795 | -2.110296 |
| 48 | 8 | 0 | -1.813951 | -0.122678 | -1.590539 |
| 49 | 6 | 0 | -8.360287 | -0.437662 | -0.635962 |
| 50 | 1 | 0 | -8.827902 | -1.287504 | -1.162845 |
| 51 | 1 | 0 | -8.883279 | 0.473381  | -0.974830 |
| 52 | 8 | 0 | -8.469335 | -0.591936 | 0.773189  |
| 53 | 1 | 0 | -9.405906 | -0.635707 | 1.015624  |

ECD calculation of compound **2**

Table S3. Energy data of optimized conformers of **2** (1*R*-OH,13*S*-OH).

| Name | Compound | conformer | Energy<br>(Hartree) | Energy<br>(kcal/mol) | Population<br>(%) |
|------|----------|-----------|---------------------|----------------------|-------------------|
| 2-1  | 2        | 1         | -1193.84            | -749148              | 79.35             |
| 2-2  | 2        | 2         | -1193.84            | -749147              | 16.79             |
| 2-3  | 2        | 3         | -1193.84            | -749146              | 3.35              |
| 2-4  | 2        | 4         | -1193.84            | -749145              | 0.21              |
| 2-5  | 2        | 5         | -1193.84            | -749145              | 0.31              |

Standard orientations at cam-b3lyp/6-31 level in methanol.

Conformer 2-1

| Center<br>Number | Atomic<br>Number | Atomic<br>Type | Coordinates (Angstroms) |           |           |
|------------------|------------------|----------------|-------------------------|-----------|-----------|
|                  |                  |                | X                       | Y         | Z         |
| 1                | 6                | 0              | 8.604206                | -0.423236 | -0.949930 |
| 2                | 1                | 0              | 9.406833                | -0.060861 | -0.292517 |
| 3                | 1                | 0              | 8.883903                | -0.134087 | -1.972588 |
| 4                | 1                | 0              | 8.588228                | -1.517382 | -0.897552 |
| 5                | 6                | 0              | 7.281709                | 0.169257  | -0.564595 |
| 6                | 1                | 0              | 7.214256                | 1.258915  | -0.591988 |
| 7                | 6                | 0              | 6.193109                | -0.532373 | -0.197055 |
| 8                | 1                | 0              | 6.245921                | -1.622155 | -0.167395 |
| 9                | 6                | 0              | 4.920496                | 0.071658  | 0.170111  |
| 10               | 1                | 0              | 4.875285                | 1.162590  | 0.134682  |
| 11               | 6                | 0              | 3.819409                | -0.612794 | 0.536005  |
| 12               | 1                | 0              | 3.844737                | -1.703142 | 0.583905  |
| 13               | 6                | 0              | 2.516128                | 0.030131  | 0.917317  |
| 14               | 1                | 0              | 2.609104                | 1.118920  | 0.807971  |
| 15               | 6                | 0              | 1.344969                | -0.495699 | 0.071383  |
| 16               | 1                | 0              | 1.591889                | -0.386089 | -0.990831 |
| 17               | 1                | 0              | 1.289174                | -1.569789 | 0.263766  |
| 18               | 8                | 0              | 2.173569                | -0.275507 | 2.287606  |
| 19               | 1                | 0              | 2.929655                | -0.041051 | 2.848830  |
| 20               | 6                | 0              | -0.007604               | 0.176466  | 0.397789  |
| 21               | 1                | 0              | -0.028103               | 0.422504  | 1.463493  |
| 22               | 6                | 0              | -1.279039               | -0.663639 | 0.026227  |
| 23               | 6                | 0              | -2.556724               | 0.008584  | 0.609751  |
| 24               | 6                | 0              | -2.597721               | 1.367320  | 0.728319  |
| 25               | 6                | 0              | -1.461336               | 2.184328  | 0.233558  |
| 26               | 6                | 0              | -0.302811               | 1.432626  | -0.456061 |
| 27               | 8                | 0              | -0.833549               | 0.862070  | -1.714804 |
| 28               | 6                | 0              | -1.384290               | -0.346471 | -1.477115 |
| 29               | 8                | 0              | -1.905916               | -1.005208 | -2.352767 |
| 30               | 8                | 0              | -1.435323               | 3.402436  | 0.350419  |
| 31               | 6                | 0              | 0.821000                | 2.373759  | -0.841578 |

|    |   |   |           |           |           |
|----|---|---|-----------|-----------|-----------|
| 32 | 1 | 0 | 1.242104  | 2.850505  | 0.047850  |
| 33 | 1 | 0 | 0.428680  | 3.166756  | -1.482997 |
| 34 | 1 | 0 | 1.609279  | 1.843149  | -1.380724 |
| 35 | 6 | 0 | -3.731211 | 2.187365  | 1.295590  |
| 36 | 1 | 0 | -4.268477 | 2.715436  | 0.497712  |
| 37 | 1 | 0 | -3.329349 | 2.961620  | 1.956592  |
| 38 | 1 | 0 | -4.454737 | 1.592291  | 1.854285  |
| 39 | 6 | 0 | -3.756887 | -0.855551 | 0.938973  |
| 40 | 1 | 0 | -4.374034 | -0.336887 | 1.678086  |
| 41 | 1 | 0 | -3.448268 | -1.793988 | 1.403457  |
| 42 | 6 | 0 | -4.714830 | -1.247191 | -0.239648 |
| 43 | 1 | 0 | -5.566073 | -1.735115 | 0.250700  |
| 44 | 6 | 0 | -5.238598 | -0.058068 | -1.046675 |
| 45 | 1 | 0 | -4.430860 | 0.469005  | -1.567488 |
| 46 | 1 | 0 | -5.753806 | 0.662704  | -0.400920 |
| 47 | 1 | 0 | -5.948990 | -0.416273 | -1.799022 |
| 48 | 8 | 0 | -4.175051 | -2.261823 | -1.076725 |
| 49 | 1 | 0 | -3.497329 | -1.884308 | -1.672554 |
| 50 | 6 | 0 | -1.173704 | -2.176533 | 0.307331  |
| 51 | 1 | 0 | -2.098026 | -2.663139 | -0.012554 |
| 52 | 1 | 0 | -0.396085 | -2.594009 | -0.341828 |
| 53 | 6 | 0 | -0.862775 | -2.530710 | 1.770195  |
| 54 | 1 | 0 | -1.623804 | -2.146873 | 2.459154  |
| 55 | 1 | 0 | 0.100599  | -2.130336 | 2.101927  |
| 56 | 1 | 0 | -0.832527 | -3.620030 | 1.889361  |

Conformer 2-2

| Center<br>Number | Atomic<br>Number | Atomic<br>Type | Coordinates (Angstroms) |           |           |
|------------------|------------------|----------------|-------------------------|-----------|-----------|
|                  |                  |                | X                       | Y         | Z         |
| 1                | 6                | 0              | -8.431297               | -1.227798 | 0.434306  |
| 2                | 1                | 0              | -8.584835               | -2.301294 | 0.612922  |
| 3                | 1                | 0              | -9.249449               | -0.900404 | -0.222447 |
| 4                | 1                | 0              | -8.534167               | -0.705764 | 1.392107  |
| 5                | 6                | 0              | -7.094681               | -0.970054 | -0.196035 |
| 6                | 1                | 0              | -6.912991               | -1.453317 | -1.158316 |
| 7                | 6                | 0              | -6.122037               | -0.203147 | 0.330931  |
| 8                | 1                | 0              | -6.292541               | 0.284286  | 1.292916  |
| 9                | 6                | 0              | -4.829821               | 0.026783  | -0.300728 |
| 10               | 1                | 0              | -4.659847               | -0.460873 | -1.261177 |
| 11               | 6                | 0              | -3.851821               | 0.788088  | 0.223432  |
| 12               | 1                | 0              | -4.006293               | 1.271623  | 1.189948  |
| 13               | 6                | 0              | -2.503307               | 1.039534  | -0.407353 |
| 14               | 1                | 0              | -2.278464               | 2.112961  | -0.319211 |
| 15               | 6                | 0              | -1.398455               | 0.225778  | 0.294860  |
| 16               | 1                | 0              | -1.482125               | 0.361331  | 1.379557  |
| 17               | 1                | 0              | -1.637362               | -0.822029 | 0.101574  |

|    |   |   |           |           |           |
|----|---|---|-----------|-----------|-----------|
| 18 | 8 | 0 | -2.449084 | 0.666893  | -1.789789 |
| 19 | 1 | 0 | -3.098898 | 1.196400  | -2.278632 |
| 20 | 6 | 0 | 0.028002  | 0.559929  | -0.194446 |
| 21 | 1 | 0 | -0.018242 | 0.819827  | -1.256336 |
| 22 | 6 | 0 | 1.090174  | -0.573170 | 0.025288  |
| 23 | 6 | 0 | 2.417143  | -0.216435 | -0.708074 |
| 24 | 6 | 0 | 2.775453  | 1.094195  | -0.834567 |
| 25 | 6 | 0 | 1.937635  | 2.150132  | -0.212490 |
| 26 | 6 | 0 | 0.719209  | 1.685065  | 0.612384  |
| 27 | 8 | 0 | 1.236920  | 0.971435  | 1.801015  |
| 28 | 6 | 0 | 1.443701  | -0.328963 | 1.504457  |
| 29 | 8 | 0 | 1.885730  | -1.116081 | 2.315247  |
| 30 | 8 | 0 | 2.195330  | 3.340850  | -0.330720 |
| 31 | 6 | 0 | -0.089115 | 2.860419  | 1.124985  |
| 32 | 1 | 0 | -0.915997 | 2.522353  | 1.754205  |
| 33 | 1 | 0 | -0.480600 | 3.448882  | 0.290681  |
| 34 | 1 | 0 | 0.554744  | 3.517269  | 1.715019  |
| 35 | 6 | 0 | 4.005733  | 1.626123  | -1.529396 |
| 36 | 1 | 0 | 4.749953  | 1.965328  | -0.797712 |
| 37 | 1 | 0 | 3.740871  | 2.504341  | -2.126123 |
| 38 | 1 | 0 | 4.482659  | 0.892171  | -2.180608 |
| 39 | 6 | 0 | 3.321535  | -1.338012 | -1.175568 |
| 40 | 1 | 0 | 3.957875  | -0.966068 | -1.983715 |
| 41 | 1 | 0 | 2.739210  | -2.158922 | -1.598313 |
| 42 | 6 | 0 | 4.284120  | -1.985218 | -0.118950 |
| 43 | 1 | 0 | 4.924254  | -2.654321 | -0.706837 |
| 44 | 6 | 0 | 5.176406  | -0.983392 | 0.615494  |
| 45 | 1 | 0 | 4.589932  | -0.289517 | 1.228913  |
| 46 | 1 | 0 | 5.773600  | -0.393347 | -0.089420 |
| 47 | 1 | 0 | 5.859764  | -1.525324 | 1.277530  |
| 48 | 8 | 0 | 3.611868  | -2.857110 | 0.780238  |
| 49 | 1 | 0 | 3.126039  | -2.339797 | 1.453334  |
| 50 | 6 | 0 | 0.585854  | -2.007452 | -0.233927 |
| 51 | 1 | 0 | 1.394750  | -2.711603 | -0.025606 |
| 52 | 1 | 0 | -0.187899 | -2.239713 | 0.505918  |
| 53 | 6 | 0 | 0.027462  | -2.238482 | -1.647104 |
| 54 | 1 | 0 | 0.771657  | -2.032240 | -2.424905 |
| 55 | 1 | 0 | -0.842381 | -1.609037 | -1.860679 |
| 56 | 1 | 0 | -0.280693 | -3.284638 | -1.757521 |

Conformer 2-3

| Center | Atomic | Atomic | Coordinates (Angstroms) |           |           |
|--------|--------|--------|-------------------------|-----------|-----------|
| Number | Number | Type   | X                       | Y         | Z         |
| 1      | 6      | 0      | 7.940010                | -1.511056 | -0.892954 |
| 2      | 1      | 0      | 8.527422                | -0.731055 | -0.396178 |
| 3      | 1      | 0      | 8.231271                | -1.535838 | -1.952276 |

|    |   |   |           |           |           |
|----|---|---|-----------|-----------|-----------|
| 4  | 1 | 0 | 8.230050  | -2.481448 | -0.466473 |
| 5  | 6 | 0 | 6.466596  | -1.274708 | -0.744250 |
| 6  | 1 | 0 | 5.810158  | -2.011060 | -1.212777 |
| 7  | 6 | 0 | 5.907709  | -0.239901 | -0.089231 |
| 8  | 1 | 0 | 6.552606  | 0.504173  | 0.381879  |
| 9  | 6 | 0 | 4.471374  | -0.035572 | 0.038340  |
| 10 | 1 | 0 | 3.840561  | -0.784921 | -0.440198 |
| 11 | 6 | 0 | 3.910863  | 1.003488  | 0.687719  |
| 12 | 1 | 0 | 4.560182  | 1.744628  | 1.156868  |
| 13 | 6 | 0 | 2.441562  | 1.275675  | 0.884555  |
| 14 | 1 | 0 | 2.224794  | 2.280082  | 0.506536  |
| 15 | 6 | 0 | 1.492352  | 0.259815  | 0.223630  |
| 16 | 1 | 0 | 1.753141  | 0.138921  | -0.834755 |
| 17 | 1 | 0 | 1.676765  | -0.709514 | 0.694777  |
| 18 | 8 | 0 | 2.154719  | 1.392486  | 2.296615  |
| 19 | 1 | 0 | 2.602559  | 0.662612  | 2.755785  |
| 20 | 6 | 0 | 0.004530  | 0.646590  | 0.366651  |
| 21 | 1 | 0 | -0.137205 | 1.139260  | 1.333678  |
| 22 | 6 | 0 | -1.014102 | -0.537099 | 0.218258  |
| 23 | 6 | 0 | -2.447677 | -0.067028 | 0.604685  |
| 24 | 6 | 0 | -2.807841 | 1.227723  | 0.368925  |
| 25 | 6 | 0 | -1.861215 | 2.142750  | -0.318220 |
| 26 | 6 | 0 | -0.516605 | 1.544329  | -0.782870 |
| 27 | 8 | 0 | -0.818504 | 0.567902  | -1.855147 |
| 28 | 6 | 0 | -1.089669 | -0.638348 | -1.317083 |
| 29 | 8 | 0 | -1.384803 | -1.600955 | -1.995084 |
| 30 | 8 | 0 | -2.128475 | 3.318207  | -0.527612 |
| 31 | 6 | 0 | 0.382096  | 2.600449  | -1.394409 |
| 32 | 1 | 0 | 0.605430  | 3.382265  | -0.663553 |
| 33 | 1 | 0 | -0.133200 | 3.075201  | -2.233066 |
| 34 | 1 | 0 | 1.314312  | 2.162025  | -1.758937 |
| 35 | 6 | 0 | -4.136710 | 1.864776  | 0.695674  |
| 36 | 1 | 0 | -4.730618 | 1.282837  | 1.401954  |
| 37 | 1 | 0 | -4.734005 | 2.007825  | -0.213774 |
| 38 | 1 | 0 | -3.972856 | 2.862516  | 1.114080  |
| 39 | 6 | 0 | -3.435923 | -1.082989 | 1.140333  |
| 40 | 1 | 0 | -4.203905 | -0.558918 | 1.716283  |
| 41 | 1 | 0 | -2.950593 | -1.772542 | 1.833957  |
| 42 | 6 | 0 | -4.196494 | -1.977273 | 0.100570  |
| 43 | 1 | 0 | -4.941280 | -2.517410 | 0.697762  |
| 44 | 6 | 0 | -4.927874 | -1.193636 | -0.990489 |
| 45 | 1 | 0 | -5.636370 | -0.478064 | -0.557467 |
| 46 | 1 | 0 | -5.485792 | -1.891182 | -1.623819 |
| 47 | 1 | 0 | -4.231760 | -0.638702 | -1.630111 |
| 48 | 8 | 0 | -3.380182 | -3.007579 | -0.442100 |



|    |   |   |           |           |           |
|----|---|---|-----------|-----------|-----------|
| 49 | 1 | 0 | -2.775020 | -2.638608 | -1.116125 |
| 50 | 6 | 0 | -0.584184 | -1.864881 | 0.873953  |
| 51 | 1 | 0 | -1.348817 | -2.621075 | 0.681334  |
| 52 | 1 | 0 | 0.310540  | -2.230523 | 0.358133  |
| 53 | 6 | 0 | -0.301723 | -1.768254 | 2.380856  |
| 54 | 1 | 0 | 0.514698  | -1.073982 | 2.606455  |
| 55 | 1 | 0 | -0.022674 | -2.753029 | 2.772873  |
| 56 | 1 | 0 | -1.174895 | -1.424064 | 2.945906  |

Conformer 2-4

| Center<br>Number | Atomic<br>Number | Atomic<br>Type | Coordinates (Angstroms) |           |           |
|------------------|------------------|----------------|-------------------------|-----------|-----------|
|                  |                  |                | X                       | Y         | Z         |
| 1                | 6                | 0              | 7.244288                | -2.224701 | 1.105048  |
| 2                | 1                | 0              | 7.434581                | -3.172184 | 0.581857  |
| 3                | 1                | 0              | 6.734445                | -2.452326 | 2.047663  |
| 4                | 1                | 0              | 8.228037                | -1.796449 | 1.342680  |
| 5                | 6                | 0              | 6.440219                | -1.289693 | 0.252037  |
| 6                | 1                | 0              | 6.880323                | -1.011006 | -0.707685 |
| 7                | 6                | 0              | 5.237086                | -0.780969 | 0.578143  |
| 8                | 1                | 0              | 4.785132                | -1.052732 | 1.533828  |
| 9                | 6                | 0              | 4.478159                | 0.124157  | -0.272648 |
| 10               | 1                | 0              | 4.940173                | 0.394537  | -1.225029 |
| 11               | 6                | 0              | 3.266180                | 0.630480  | 0.028330  |
| 12               | 1                | 0              | 2.802771                | 0.381508  | 0.983917  |
| 13               | 6                | 0              | 2.517171                | 1.590117  | -0.857101 |
| 14               | 1                | 0              | 3.124825                | 1.770756  | -1.757778 |
| 15               | 6                | 0              | 1.145319                | 1.089809  | -1.355981 |
| 16               | 1                | 0              | 0.780582                | 1.802084  | -2.104303 |
| 17               | 1                | 0              | 1.350809                | 0.166386  | -1.902078 |
| 18               | 8                | 0              | 2.311287                | 2.837200  | -0.169104 |
| 19               | 1                | 0              | 3.163394                | 3.121568  | 0.198878  |
| 20               | 6                | 0              | 0.062088                | 0.846784  | -0.274971 |
| 21               | 1                | 0              | 0.539630                | 0.716400  | 0.700796  |
| 22               | 6                | 0              | -0.899820               | -0.370791 | -0.545492 |
| 23               | 6                | 0              | -1.752301               | -0.669260 | 0.723588  |
| 24               | 6                | 0              | -2.102005               | 0.362228  | 1.544833  |
| 25               | 6                | 0              | -1.738761               | 1.756117  | 1.176263  |
| 26               | 6                | 0              | -1.010902               | 1.965330  | -0.170664 |
| 27               | 8                | 0              | -1.971560               | 1.608331  | -1.242783 |
| 28               | 6                | 0              | -1.921834               | 0.288308  | -1.491390 |
| 29               | 8                | 0              | -2.633850               | -0.248153 | -2.316363 |
| 30               | 8                | 0              | -2.013940               | 2.706143  | 1.895781  |
| 31               | 6                | 0              | -0.644604               | 3.417828  | -0.384724 |
| 32               | 1                | 0              | -1.544581               | 4.031089  | -0.293768 |
| 33               | 1                | 0              | -0.208325               | 3.569991  | -1.373646 |
| 34               | 1                | 0              | 0.077815                | 3.741370  | 0.364921  |

|    |   |   |           |           |           |
|----|---|---|-----------|-----------|-----------|
| 35 | 6 | 0 | -2.898724 | 0.262211  | 2.823286  |
| 36 | 1 | 0 | -2.962225 | -0.755049 | 3.212473  |
| 37 | 1 | 0 | -3.920536 | 0.633982  | 2.675374  |
| 38 | 1 | 0 | -2.449172 | 0.903379  | 3.587763  |
| 39 | 6 | 0 | -2.258241 | -2.078766 | 0.957912  |
| 40 | 1 | 0 | -2.465371 | -2.205941 | 2.024352  |
| 41 | 1 | 0 | -1.495430 | -2.817785 | 0.704928  |
| 42 | 6 | 0 | -3.559674 | -2.520539 | 0.201414  |
| 43 | 1 | 0 | -3.808513 | -3.497178 | 0.634355  |
| 44 | 6 | 0 | -4.753530 | -1.585203 | 0.400900  |
| 45 | 1 | 0 | -4.991703 | -1.467807 | 1.464464  |
| 46 | 1 | 0 | -5.629464 | -2.005145 | -0.104411 |
| 47 | 1 | 0 | -4.566229 | -0.589550 | -0.017626 |
| 48 | 8 | 0 | -3.331438 | -2.803818 | -1.173009 |
| 49 | 1 | 0 | -3.249526 | -1.971099 | -1.680140 |
| 50 | 6 | 0 | -0.261696 | -1.622442 | -1.181341 |
| 51 | 1 | 0 | -1.044021 | -2.367660 | -1.341046 |
| 52 | 1 | 0 | 0.086456  | -1.365042 | -2.187755 |
| 53 | 6 | 0 | 0.898014  | -2.237913 | -0.385218 |
| 54 | 1 | 0 | 1.215370  | -3.175930 | -0.855277 |
| 55 | 1 | 0 | 0.617301  | -2.467176 | 0.649374  |
| 56 | 1 | 0 | 1.770871  | -1.579165 | -0.346610 |

Conformer 2-5

| Center<br>Number | Atomic<br>Number | Atomic<br>Type | Coordinates (Angstroms) |           |           |
|------------------|------------------|----------------|-------------------------|-----------|-----------|
|                  |                  |                | X                       | Y         | Z         |
| 1                | 6                | 0              | 8.270749                | -1.271578 | -0.498634 |
| 2                | 1                | 0              | 8.957498                | -1.327117 | 0.357324  |
| 3                | 1                | 0              | 8.703579                | -0.593206 | -1.242128 |
| 4                | 1                | 0              | 8.235772                | -2.278927 | -0.936909 |
| 5                | 6                | 0              | 6.904184                | -0.824710 | -0.069596 |
| 6                | 1                | 0              | 6.412570                | -1.439003 | 0.686605  |
| 7                | 6                | 0              | 6.269317                | 0.264920  | -0.536291 |
| 8                | 1                | 0              | 6.792953                | 0.902336  | -1.250833 |
| 9                | 6                | 0              | 4.926469                | 0.717414  | -0.150724 |
| 10               | 1                | 0              | 4.750562                | 1.791213  | -0.247342 |
| 11               | 6                | 0              | 3.905930                | -0.051101 | 0.271837  |
| 12               | 1                | 0              | 4.019210                | -1.133980 | 0.338989  |
| 13               | 6                | 0              | 2.566977                | 0.492414  | 0.687860  |
| 14               | 1                | 0              | 2.551756                | 1.576672  | 0.515134  |
| 15               | 6                | 0              | 1.413240                | -0.190755 | -0.063446 |
| 16               | 1                | 0              | 1.588785                | -0.105384 | -1.142197 |
| 17               | 1                | 0              | 1.483374                | -1.254960 | 0.175530  |
| 18               | 8                | 0              | 2.325507                | 0.236901  | 2.089816  |
| 19               | 1                | 0              | 3.076218                | 0.587121  | 2.595161  |
| 20               | 6                | 0              | 0.015141                | 0.346674  | 0.312776  |

|    |   |   |           |           |           |
|----|---|---|-----------|-----------|-----------|
| 21 | 1 | 0 | 0.020103  | 0.625708  | 1.370481  |
| 22 | 6 | 0 | -1.174767 | -0.636757 | 0.031810  |
| 23 | 6 | 0 | -2.488546 | -0.085031 | 0.660804  |
| 24 | 6 | 0 | -2.671543 | 1.264809  | 0.741080  |
| 25 | 6 | 0 | -1.654970 | 2.181106  | 0.165612  |
| 26 | 6 | 0 | -0.456502 | 1.534260  | -0.560332 |
| 27 | 8 | 0 | -0.982260 | 0.867891  | -1.773239 |
| 28 | 6 | 0 | -1.387288 | -0.383399 | -1.472611 |
| 29 | 8 | 0 | -1.877665 | -1.123250 | -2.300314 |
| 30 | 8 | 0 | -1.754213 | 3.398410  | 0.245827  |
| 31 | 6 | 0 | 0.539436  | 2.575439  | -1.030023 |
| 32 | 1 | 0 | 0.946488  | 3.125791  | -0.177255 |
| 33 | 1 | 0 | 0.034630  | 3.298475  | -1.675421 |
| 34 | 1 | 0 | 1.355572  | 2.112864  | -1.590635 |
| 35 | 6 | 0 | -3.862872 | 1.975059  | 1.337620  |
| 36 | 1 | 0 | -4.521259 | 2.363029  | 0.549872  |
| 37 | 1 | 0 | -3.523715 | 2.843667  | 1.909817  |
| 38 | 1 | 0 | -4.459644 | 1.336765  | 1.991176  |
| 39 | 6 | 0 | -3.569703 | -1.059899 | 1.079942  |
| 40 | 1 | 0 | -4.205038 | -0.580919 | 1.830446  |
| 41 | 1 | 0 | -3.137752 | -1.939484 | 1.561284  |
| 42 | 6 | 0 | -4.533087 | -1.601925 | -0.031924 |
| 43 | 1 | 0 | -5.297193 | -2.163826 | 0.519007  |
| 44 | 6 | 0 | -5.230358 | -0.512188 | -0.848381 |
| 45 | 1 | 0 | -5.792500 | 0.169633  | -0.199596 |
| 46 | 1 | 0 | -5.930893 | -0.978416 | -1.548922 |
| 47 | 1 | 0 | -4.516175 | 0.082594  | -1.429681 |
| 48 | 8 | 0 | -3.922699 | -2.580061 | -0.863955 |
| 49 | 1 | 0 | -3.323889 | -2.150408 | -1.507048 |
| 50 | 6 | 0 | -0.894384 | -2.119719 | 0.348098  |
| 51 | 1 | 0 | -1.775944 | -2.711056 | 0.089935  |
| 52 | 1 | 0 | -0.109558 | -2.474202 | -0.329255 |
| 53 | 6 | 0 | -0.476553 | -2.392407 | 1.801607  |
| 54 | 1 | 0 | 0.455057  | -1.884629 | 2.071421  |
| 55 | 1 | 0 | -0.326711 | -3.468379 | 1.948369  |
| 56 | 1 | 0 | -1.238424 | -2.066840 | 2.519084  |

ECD calculation of compound **3**

Table S4. Energy data of optimized conformers of **3** (9'R-OH).

| Name | Compound | conformer | Energy<br>(Hartree) | Energy<br>(kcal/mol) | Population<br>(%) |
|------|----------|-----------|---------------------|----------------------|-------------------|
| 3-1  | 3        | 1         | -1763.64            | -1106702             | 59.53             |
| 3-2  | 3        | 2         | -1763.64            | -1106701             | 9.96              |
| 3-3  | 3        | 3         | -1763.64            | -1106701             | 14.01             |
| 3-4  | 3        | 4         | -1763.64            | -1106701             | 8.96              |
| 3-5  | 3        | 5         | -1763.64            | -1106700             | 1.98              |
| 3-6  | 3        | 6         | -1763.64            | -1106699             | 1.48              |
| 3-7  | 3        | 7         | -1763.64            | -1106700             | 4.08              |

Standard orientations at cam-b3lyp/6-31 level in methanol.

Conformer 2-1

| Center | Atomic | Atomic | Coordinates (Angstroms) |           |           |
|--------|--------|--------|-------------------------|-----------|-----------|
| Number | Number | Type   | X                       | Y         | Z         |
| 1      | 6      | 0      | -2.988978               | -0.962438 | -1.226469 |
| 2      | 6      | 0      | -2.892721               | -1.661134 | 0.210345  |
| 3      | 8      | 0      | -3.818282               | -0.979630 | 1.067706  |
| 4      | 6      | 0      | -3.221319               | 0.307927  | 1.235058  |
| 5      | 6      | 0      | -3.268646               | 1.014633  | -0.200619 |
| 6      | 8      | 0      | -3.931191               | 0.102452  | -1.089891 |
| 7      | 6      | 0      | -1.779315               | -0.039107 | 1.729815  |
| 8      | 6      | 0      | -0.733256               | 1.045329  | 1.421621  |
| 9      | 6      | 0      | -0.749045               | 1.588529  | 0.057460  |
| 10     | 6      | 0      | -1.864171               | 1.151625  | -0.864909 |
| 11     | 6      | 0      | -1.688385               | -0.219011 | -1.668470 |
| 12     | 6      | 0      | -0.378365               | -0.925946 | -1.298505 |
| 13     | 6      | 0      | -0.317312               | -1.524638 | 0.044630  |
| 14     | 6      | 0      | -1.531379               | -1.398734 | 0.929918  |

|    |   |   |           |           |           |
|----|---|---|-----------|-----------|-----------|
| 15 | 1 | 0 | -1.964532 | 1.914922  | -1.637047 |
| 16 | 6 | 0 | -4.040952 | 2.325668  | -0.203416 |
| 17 | 1 | 0 | -4.072897 | 2.722563  | -1.222971 |
| 18 | 1 | 0 | -3.562648 | 3.061234  | 0.449607  |
| 19 | 1 | 0 | -5.074543 | 2.187685  | 0.131760  |
| 20 | 8 | 0 | -3.425956 | -1.823189 | -2.231607 |
| 21 | 1 | 0 | -4.357549 | -2.039078 | -2.061746 |
| 22 | 6 | 0 | -1.714666 | 0.065606  | -3.178168 |
| 23 | 1 | 0 | -0.899032 | 0.744005  | -3.438707 |
| 24 | 1 | 0 | -2.667814 | 0.526794  | -3.452425 |
| 25 | 1 | 0 | -1.595235 | -0.852435 | -3.758049 |
| 26 | 1 | 0 | -1.444382 | -2.161231 | 1.703896  |
| 27 | 6 | 0 | -3.262282 | -3.137301 | 0.190128  |
| 28 | 1 | 0 | -3.223871 | -3.532323 | 1.210261  |
| 29 | 1 | 0 | -2.569978 | -3.704696 | -0.438502 |
| 30 | 1 | 0 | -4.277364 | -3.295030 | -0.189396 |
| 31 | 8 | 0 | -3.917362 | 1.003228  | 2.220316  |
| 32 | 1 | 0 | -4.862408 | 0.986620  | 1.997259  |
| 33 | 6 | 0 | -1.785283 | -0.335951 | 3.237210  |
| 34 | 1 | 0 | -2.570527 | -1.061186 | 3.470111  |
| 35 | 1 | 0 | -1.964593 | 0.569772  | 3.819732  |
| 36 | 1 | 0 | -0.816752 | -0.745422 | 3.535716  |
| 37 | 8 | 0 | 0.049510  | 1.393150  | 2.308911  |
| 38 | 8 | 0 | 0.553082  | -0.939156 | -2.105941 |
| 39 | 6 | 0 | 0.787314  | -2.205089 | 0.503399  |

|    |   |   |          |           |           |
|----|---|---|----------|-----------|-----------|
| 40 | 6 | 0 | 1.992930 | -2.504535 | -0.254755 |
| 41 | 1 | 0 | 1.907109 | -2.402182 | -1.329825 |
| 42 | 6 | 0 | 3.181028 | -2.859142 | 0.298367  |
| 43 | 1 | 0 | 3.314639 | -2.865485 | 1.382679  |
| 44 | 6 | 0 | 4.358426 | -3.196469 | -0.477049 |
| 45 | 1 | 0 | 4.251050 | -3.178898 | -1.562471 |
| 46 | 6 | 0 | 5.549078 | -3.525598 | 0.064711  |
| 47 | 1 | 0 | 5.640659 | -3.540077 | 1.152903  |
| 48 | 6 | 0 | 6.780892 | -3.883960 | -0.709781 |
| 49 | 1 | 0 | 6.606380 | -3.843203 | -1.790340 |
| 50 | 1 | 0 | 7.125978 | -4.896197 | -0.456455 |
| 51 | 1 | 0 | 7.610272 | -3.203703 | -0.470247 |
| 52 | 8 | 0 | 0.740593 | -2.643366 | 1.799693  |
| 53 | 1 | 0 | 1.439804 | -3.299768 | 1.945552  |
| 54 | 6 | 0 | 0.206299 | 2.448108  | -0.420566 |
| 55 | 6 | 0 | 1.404365 | 2.973440  | 0.336558  |
| 56 | 1 | 0 | 1.202609 | 4.011534  | 0.642984  |
| 57 | 1 | 0 | 1.524489 | 2.395778  | 1.252469  |
| 58 | 6 | 0 | 2.711301 | 2.956523  | -0.471435 |
| 59 | 1 | 0 | 2.864542 | 1.956905  | -0.900865 |
| 60 | 6 | 0 | 3.903075 | 3.345553  | 0.353896  |
| 61 | 1 | 0 | 3.846736 | 4.321987  | 0.838231  |
| 62 | 6 | 0 | 4.986383 | 2.574343  | 0.508819  |
| 63 | 1 | 0 | 5.009575 | 1.600620  | 0.014013  |
| 64 | 6 | 0 | 6.190398 | 2.924739  | 1.334905  |

|    |   |   |          |          |           |
|----|---|---|----------|----------|-----------|
| 65 | 1 | 0 | 6.336776 | 2.193638 | 2.141578  |
| 66 | 1 | 0 | 6.095245 | 3.917285 | 1.788183  |
| 67 | 1 | 0 | 7.104614 | 2.910235 | 0.726191  |
| 68 | 8 | 0 | 0.081008 | 2.881993 | -1.694678 |
| 69 | 1 | 0 | 0.869814 | 3.420733 | -1.934505 |
| 70 | 8 | 0 | 2.526188 | 3.910181 | -1.563021 |
| 71 | 1 | 0 | 3.300643 | 3.875490 | -2.147665 |

#### Conformer 2-2

| Center | Atomic | Atomic | Coordinates (Angstroms) |           |           |
|--------|--------|--------|-------------------------|-----------|-----------|
| Number | Number | Type   | X                       | Y         | Z         |
| 1      | 6      | 0      | 3.040552                | 0.743409  | -1.227193 |
| 2      | 6      | 0      | 3.047005                | 1.410430  | 0.227516  |
| 3      | 8      | 0      | 3.897698                | 0.604459  | 1.053851  |
| 4      | 6      | 0      | 3.158883                | -0.610532 | 1.196927  |
| 5      | 6      | 0      | 3.113215                | -1.279945 | -0.256411 |
| 6      | 8      | 0      | 3.860971                | -0.422497 | -1.132949 |
| 7      | 6      | 0      | 1.770324                | -0.113468 | 1.718987  |
| 8      | 6      | 0      | 0.599406                | -1.057309 | 1.397115  |
| 9      | 6      | 0      | 0.550111                | -1.582191 | 0.025569  |
| 10     | 6      | 0      | 1.695407                | -1.244351 | -0.901221 |
| 11     | 6      | 0      | 1.658518                | 0.159542  | -1.663479 |
| 12     | 6      | 0      | 0.438263                | 0.993318  | -1.251888 |
| 13     | 6      | 0      | 0.474026                | 1.581030  | 0.096598  |
| 14     | 6      | 0      | 1.673810                | 1.289094  | 0.961255  |
| 15     | 1      | 0      | 1.701309                | -1.991394 | -1.695347 |

|    |   |   |           |           |           |
|----|---|---|-----------|-----------|-----------|
| 16 | 6 | 0 | 3.739859  | -2.666158 | -0.302242 |
| 17 | 1 | 0 | 3.719856  | -3.037269 | -1.331709 |
| 18 | 1 | 0 | 3.192166  | -3.363214 | 0.338360  |
| 19 | 1 | 0 | 4.785681  | -2.648132 | 0.022989  |
| 20 | 8 | 0 | 3.552833  | 1.576372  | -2.220054 |
| 21 | 1 | 0 | 4.503253  | 1.693356  | -2.057894 |
| 22 | 6 | 0 | 1.629463  | -0.085773 | -3.180017 |
| 23 | 1 | 0 | 0.740812  | -0.665249 | -3.440360 |
| 24 | 1 | 0 | 2.522189  | -0.640678 | -3.482352 |
| 25 | 1 | 0 | 1.601464  | 0.854615  | -3.735272 |
| 26 | 1 | 0 | 1.687133  | 2.033771  | 1.757191  |
| 27 | 6 | 0 | 3.587323  | 2.833108  | 0.236483  |
| 28 | 1 | 0 | 3.607644  | 3.205460  | 1.265665  |
| 29 | 1 | 0 | 2.960000  | 3.492825  | -0.369688 |
| 30 | 1 | 0 | 4.609772  | 2.878218  | -0.153131 |
| 31 | 8 | 0 | 3.779418  | -1.406446 | 2.156007  |
| 32 | 1 | 0 | 4.717039  | -1.494923 | 1.919205  |
| 33 | 6 | 0 | 1.824562  | 0.139403  | 3.233683  |
| 34 | 1 | 0 | 2.691997  | 0.760467  | 3.475600  |
| 35 | 1 | 0 | 1.900553  | -0.796516 | 3.790689  |
| 36 | 1 | 0 | 0.913923  | 0.652645  | 3.553323  |
| 37 | 8 | 0 | -0.223451 | -1.311681 | 2.279776  |
| 38 | 8 | 0 | -0.508645 | 1.109285  | -2.033052 |
| 39 | 6 | 0 | -0.528649 | 2.392742  | 0.575717  |
| 40 | 6 | 0 | -1.687579 | 2.860168  | -0.169355 |



|    |   |   |           |           |           |
|----|---|---|-----------|-----------|-----------|
| 41 | 1 | 0 | -1.621187 | 2.763419  | -1.246296 |
| 42 | 6 | 0 | -2.816224 | 3.360327  | 0.395647  |
| 43 | 1 | 0 | -2.944218 | 3.366943  | 1.480683  |
| 44 | 6 | 0 | -3.941001 | 3.862338  | -0.368436 |
| 45 | 1 | 0 | -3.839398 | 3.850022  | -1.454415 |
| 46 | 6 | 0 | -5.078016 | 4.332014  | 0.184522  |
| 47 | 1 | 0 | -5.164819 | 4.337798  | 1.273131  |
| 48 | 6 | 0 | -6.255732 | 4.858102  | -0.578123 |
| 49 | 1 | 0 | -7.163502 | 4.282440  | -0.348991 |
| 50 | 1 | 0 | -6.089047 | 4.817279  | -1.659915 |
| 51 | 1 | 0 | -6.470506 | 5.900391  | -0.303524 |
| 52 | 8 | 0 | -0.414800 | 2.804303  | 1.876301  |
| 53 | 1 | 0 | -1.020095 | 3.545541  | 2.035608  |
| 54 | 6 | 0 | -0.490135 | -2.332673 | -0.457571 |
| 55 | 6 | 0 | -1.727612 | -2.758281 | 0.296022  |
| 56 | 1 | 0 | -1.664159 | -3.835456 | 0.511996  |
| 57 | 1 | 0 | -1.751966 | -2.243503 | 1.255807  |
| 58 | 6 | 0 | -3.038410 | -2.513635 | -0.475802 |
| 59 | 1 | 0 | -3.044066 | -1.473164 | -0.834328 |
| 60 | 6 | 0 | -4.246861 | -2.741289 | 0.397305  |
| 61 | 1 | 0 | -4.402727 | -1.974469 | 1.158151  |
| 62 | 6 | 0 | -5.086191 | -3.779064 | 0.312618  |
| 63 | 1 | 0 | -4.901211 | -4.540951 | -0.445140 |
| 64 | 6 | 0 | -6.279583 | -3.994819 | 1.200162  |
| 65 | 1 | 0 | -6.390043 | -3.190039 | 1.935230  |

|    |   |   |           |           |           |
|----|---|---|-----------|-----------|-----------|
| 66 | 1 | 0 | -6.195418 | -4.944995 | 1.744897  |
| 67 | 1 | 0 | -7.205963 | -4.050687 | 0.612281  |
| 68 | 8 | 0 | -0.422254 | -2.753220 | -1.741465 |
| 69 | 1 | 0 | -1.276427 | -3.177040 | -1.984876 |
| 70 | 8 | 0 | -3.013488 | -3.395346 | -1.625607 |
| 71 | 1 | 0 | -3.724691 | -3.142571 | -2.236356 |

#### Conformer 2-3

| Center | Atomic | Atomic | Coordinates (Angstroms) |           |           |
|--------|--------|--------|-------------------------|-----------|-----------|
| Number | Number | Type   | X                       | Y         | Z         |
| 1      | 6      | 0      | 0.146793                | -2.903442 | 1.185727  |
| 2      | 6      | 0      | -0.327832               | -3.121557 | -0.327202 |
| 3      | 8      | 0      | 0.843965                | -3.446782 | -1.089370 |
| 4      | 6      | 0      | 1.579191                | -2.221774 | -1.095738 |
| 5      | 6      | 0      | 2.034636                | -1.964983 | 0.416355  |
| 6      | 8      | 0      | 1.564739                | -3.080532 | 1.187406  |
| 7      | 6      | 0      | 0.534706                | -1.192062 | -1.635142 |
| 8      | 6      | 0      | 0.777528                | 0.261470  | -1.194168 |
| 9      | 6      | 0      | 1.138909                | 0.458948  | 0.218316  |
| 10     | 6      | 0      | 1.288424                | -0.770299 | 1.085403  |
| 11     | 6      | 0      | -0.021620               | -1.440163 | 1.706608  |
| 12     | 6      | 0      | -1.307451               | -0.737340 | 1.247075  |
| 13     | 6      | 0      | -1.683556               | -0.923793 | -0.163557 |
| 14     | 6      | 0      | -0.804798               | -1.804198 | -1.015695 |
| 15     | 1      | 0      | 1.887785                | -0.483773 | 1.949663  |
| 16     | 6      | 0      | 3.544407                | -1.876709 | 0.586053  |

|    |   |   |           |           |           |
|----|---|---|-----------|-----------|-----------|
| 17 | 1 | 0 | 3.950868  | -1.030683 | 0.024606  |
| 18 | 1 | 0 | 4.044077  | -2.788636 | 0.241998  |
| 19 | 1 | 0 | 3.780224  | -1.748476 | 1.647303  |
| 20 | 8 | 0 | -0.421120 | -3.807976 | 2.080369  |
| 21 | 1 | 0 | -0.072772 | -4.692471 | 1.881522  |
| 22 | 6 | 0 | 0.065598  | -1.398840 | 3.240035  |
| 23 | 1 | 0 | 0.952970  | -1.942814 | 3.576386  |
| 24 | 1 | 0 | -0.814665 | -1.852566 | 3.700489  |
| 25 | 1 | 0 | 0.130246  | -0.361078 | 3.575701  |
| 26 | 1 | 0 | -1.393990 | -2.109082 | -1.880648 |
| 27 | 6 | 0 | -1.328964 | -4.256131 | -0.487892 |
| 28 | 1 | 0 | -2.250975 | -4.042766 | 0.060432  |
| 29 | 1 | 0 | -0.924595 | -5.206298 | -0.122931 |
| 30 | 1 | 0 | -1.565427 | -4.381294 | -1.549346 |
| 31 | 8 | 0 | 2.647125  | -2.342306 | -1.983018 |
| 32 | 1 | 0 | 3.123565  | -3.162671 | -1.774957 |
| 33 | 6 | 0 | 0.455624  | -1.258408 | -3.168111 |
| 34 | 1 | 0 | 1.356195  | -0.849391 | -3.630945 |
| 35 | 1 | 0 | -0.401166 | -0.676932 | -3.517225 |
| 36 | 1 | 0 | 0.341650  | -2.298015 | -3.488907 |
| 37 | 8 | 0 | 0.642819  | 1.164440  | -2.022496 |
| 38 | 8 | 0 | -1.940424 | -0.050945 | 2.050855  |
| 39 | 6 | 0 | -2.796985 | -0.337599 | -0.722026 |
| 40 | 6 | 0 | -3.782933 | 0.475025  | -0.026636 |
| 41 | 1 | 0 | -3.757734 | 0.413301  | 1.054549  |

|    |   |   |           |           |           |
|----|---|---|-----------|-----------|-----------|
| 42 | 6 | 0 | -4.667688 | 1.303831  | -0.637768 |
| 43 | 1 | 0 | -4.640812 | 1.456538  | -1.719388 |
| 44 | 6 | 0 | -5.660379 | 2.083481  | 0.074138  |
| 45 | 1 | 0 | -5.692622 | 1.963555  | 1.157709  |
| 46 | 6 | 0 | -6.521317 | 2.931711  | -0.524585 |
| 47 | 1 | 0 | -6.474715 | 3.041850  | -1.610118 |
| 48 | 6 | 0 | -7.555060 | 3.754706  | 0.181999  |
| 49 | 1 | 0 | -7.399144 | 4.826769  | -0.003289 |
| 50 | 1 | 0 | -7.534818 | 3.588819  | 1.264465  |
| 51 | 1 | 0 | -8.564864 | 3.519201  | -0.182459 |
| 52 | 8 | 0 | -2.984247 | -0.539758 | -2.062948 |
| 53 | 1 | 0 | -3.886517 | -0.280708 | -2.306825 |
| 54 | 6 | 0 | 1.344583  | 1.693177  | 0.777676  |
| 55 | 6 | 0 | 1.213780  | 3.034311  | 0.094495  |
| 56 | 1 | 0 | 1.090082  | 2.880716  | -0.976767 |
| 57 | 1 | 0 | 0.295677  | 3.511985  | 0.469018  |
| 58 | 6 | 0 | 2.377724  | 4.008098  | 0.346709  |
| 59 | 1 | 0 | 2.160310  | 4.934501  | -0.200451 |
| 60 | 6 | 0 | 3.726910  | 3.489003  | -0.063004 |
| 61 | 1 | 0 | 4.028406  | 2.530621  | 0.362838  |
| 62 | 6 | 0 | 4.546564  | 4.136627  | -0.901023 |
| 63 | 1 | 0 | 4.217168  | 5.089449  | -1.322237 |
| 64 | 6 | 0 | 5.896709  | 3.651773  | -1.343291 |
| 65 | 1 | 0 | 6.677748  | 4.385091  | -1.101164 |
| 66 | 1 | 0 | 5.922132  | 3.511338  | -2.432273 |

|    |   |   |          |          |           |
|----|---|---|----------|----------|-----------|
| 67 | 1 | 0 | 6.159505 | 2.699446 | -0.870780 |
| 68 | 8 | 0 | 1.656098 | 1.748586 | 2.094308  |
| 69 | 1 | 0 | 1.882060 | 2.676961 | 2.330112  |
| 70 | 8 | 0 | 2.354153 | 4.314883 | 1.776216  |
| 71 | 1 | 0 | 3.188274 | 4.751451 | 2.014834  |

#### Conformer 2-4

| Center | Atomic | Atomic | Coordinates (Angstroms) |           |           |
|--------|--------|--------|-------------------------|-----------|-----------|
| Number | Number | Type   | X                       | Y         | Z         |
| 1      | 6      | 0      | 0.080823                | -2.889110 | 1.198749  |
| 2      | 6      | 0      | -0.392557               | -3.097489 | -0.316484 |
| 3      | 8      | 0      | 0.774422                | -3.463141 | -1.068601 |
| 4      | 6      | 0      | 1.546219                | -2.260792 | -1.078552 |
| 5      | 6      | 0      | 1.995003                | -2.001787 | 0.434680  |
| 6      | 8      | 0      | 1.493626                | -3.100538 | 1.209445  |
| 7      | 6      | 0      | 0.537886                | -1.205978 | -1.635854 |
| 8      | 6      | 0      | 0.814106                | 0.243261  | -1.203986 |
| 9      | 6      | 0      | 1.158071                | 0.442057  | 0.212807  |
| 10     | 6      | 0      | 1.270535                | -0.784585 | 1.089580  |
| 11     | 6      | 0      | -0.055587               | -1.419411 | 1.711860  |
| 12     | 6      | 0      | -1.338317               | -0.713085 | 1.248044  |
| 13     | 6      | 0      | -1.670729               | -0.844050 | -0.179379 |
| 14     | 6      | 0      | -0.823129               | -1.770923 | -1.016773 |
| 15     | 1      | 0      | 1.872155                | -0.505000 | 1.954537  |
| 16     | 6      | 0      | 3.505097                | -1.946548 | 0.615460  |
| 17     | 1      | 0      | 3.935461                | -1.114548 | 0.050783  |

|    |   |   |           |           |           |
|----|---|---|-----------|-----------|-----------|
| 18 | 1 | 0 | 3.986199  | -2.871962 | 0.281511  |
| 19 | 1 | 0 | 3.735692  | -1.815606 | 1.677536  |
| 20 | 8 | 0 | -0.513882 | -3.775809 | 2.092771  |
| 21 | 1 | 0 | -0.187166 | -4.669640 | 1.899036  |
| 22 | 6 | 0 | 0.030386  | -1.372408 | 3.245069  |
| 23 | 1 | 0 | 0.909099  | -1.928169 | 3.585071  |
| 24 | 1 | 0 | -0.857380 | -1.809260 | 3.706628  |
| 25 | 1 | 0 | 0.111492  | -0.334076 | 3.576212  |
| 26 | 1 | 0 | -1.416884 | -2.065664 | -1.881782 |
| 27 | 6 | 0 | -1.427598 | -4.201370 | -0.477204 |
| 28 | 1 | 0 | -2.345888 | -3.956282 | 0.064116  |
| 29 | 1 | 0 | -1.055249 | -5.161389 | -0.104311 |
| 30 | 1 | 0 | -1.661738 | -4.324992 | -1.539308 |
| 31 | 8 | 0 | 2.618199  | -2.422471 | -1.954591 |
| 32 | 1 | 0 | 3.059135  | -3.261466 | -1.742558 |
| 33 | 6 | 0 | 0.468731  | -1.285512 | -3.168581 |
| 34 | 1 | 0 | 1.385115  | -0.908759 | -3.627912 |
| 35 | 1 | 0 | -0.367551 | -0.682979 | -3.530659 |
| 36 | 1 | 0 | 0.326122  | -2.324417 | -3.479935 |
| 37 | 8 | 0 | 0.713793  | 1.143407  | -2.040631 |
| 38 | 8 | 0 | -2.005840 | -0.074046 | 2.062978  |
| 39 | 6 | 0 | -2.699900 | -0.149767 | -0.774803 |
| 40 | 6 | 0 | -3.579286 | 0.805944  | -0.121349 |
| 41 | 1 | 0 | -3.267027 | 1.118002  | 0.867951  |
| 42 | 6 | 0 | -4.741211 | 1.276789  | -0.641538 |

|    |   |   |           |           |           |
|----|---|---|-----------|-----------|-----------|
| 43 | 1 | 0 | -5.123685 | 0.910562  | -1.597501 |
| 44 | 6 | 0 | -5.585277 | 2.244080  | 0.030559  |
| 45 | 1 | 0 | -5.235329 | 2.610096  | 0.996576  |
| 46 | 6 | 0 | -6.754406 | 2.698063  | -0.465670 |
| 47 | 1 | 0 | -7.092606 | 2.320287  | -1.432973 |
| 48 | 6 | 0 | -7.649498 | 3.693740  | 0.207139  |
| 49 | 1 | 0 | -7.241134 | 4.020211  | 1.169580  |
| 50 | 1 | 0 | -8.647690 | 3.269574  | 0.384994  |
| 51 | 1 | 0 | -7.796103 | 4.582456  | -0.422702 |
| 52 | 8 | 0 | -2.900632 | -0.388227 | -2.107255 |
| 53 | 1 | 0 | -3.482559 | 0.292229  | -2.478595 |
| 54 | 6 | 0 | 1.381604  | 1.675221  | 0.767524  |
| 55 | 6 | 0 | 1.287930  | 3.014618  | 0.074547  |
| 56 | 1 | 0 | 1.176218  | 2.856937  | -0.997425 |
| 57 | 1 | 0 | 0.374750  | 3.513487  | 0.433450  |
| 58 | 6 | 0 | 2.467037  | 3.967444  | 0.336631  |
| 59 | 1 | 0 | 2.272604  | 4.895704  | -0.215997 |
| 60 | 6 | 0 | 3.810624  | 3.422504  | -0.057375 |
| 61 | 1 | 0 | 4.091106  | 2.460542  | 0.374659  |
| 62 | 6 | 0 | 4.648997  | 4.052377  | -0.890452 |
| 63 | 1 | 0 | 4.339902  | 5.009146  | -1.318089 |
| 64 | 6 | 0 | 5.994271  | 3.542606  | -1.319065 |
| 65 | 1 | 0 | 6.236478  | 2.587431  | -0.841314 |
| 66 | 1 | 0 | 6.785719  | 4.263144  | -1.072470 |
| 67 | 1 | 0 | 6.026750  | 3.398192  | -2.407337 |

|    |   |   |          |          |          |
|----|---|---|----------|----------|----------|
| 68 | 8 | 0 | 1.672695 | 1.732728 | 2.088985 |
| 69 | 1 | 0 | 1.919446 | 2.656709 | 2.321426 |
| 70 | 8 | 0 | 2.433043 | 4.279649 | 1.764634 |
| 71 | 1 | 0 | 3.272228 | 4.701756 | 2.011420 |

Conformer 2-5

| Center | Atomic | Atomic | Coordinates (Angstroms) |           |           |
|--------|--------|--------|-------------------------|-----------|-----------|
| Number | Number | Type   | X                       | Y         | Z         |
| 1      | 6      | 0      | 0.469169                | -2.732349 | 1.295952  |
| 2      | 6      | 0      | -0.043263               | -3.095455 | -0.176298 |
| 3      | 8      | 0      | 1.121943                | -3.360327 | -0.970426 |
| 4      | 6      | 0      | 1.734185                | -2.075417 | -1.090134 |
| 5      | 6      | 0      | 2.222132                | -1.671961 | 0.379370  |
| 6      | 8      | 0      | 1.896710                | -2.772040 | 1.242132  |
| 7      | 6      | 0      | 0.573752                | -1.187925 | -1.646297 |
| 8      | 6      | 0      | 0.702967                | 0.307852  | -1.315210 |
| 9      | 6      | 0      | 1.077052                | 0.634585  | 0.069341  |
| 10     | 6      | 0      | 1.388877                | -0.511627 | 1.004577  |
| 11     | 6      | 0      | 0.178942                | -1.260250 | 1.730236  |
| 12     | 6      | 0      | -1.186305               | -0.714783 | 1.288920  |
| 13     | 6      | 0      | -1.598578               | -1.029383 | -0.088455 |
| 14     | 6      | 0      | -0.673549               | -1.877627 | -0.924275 |
| 15     | 1      | 0      | 1.992247                | -0.107638 | 1.817411  |
| 16     | 6      | 0      | 3.720743                | -1.424621 | 0.470475  |
| 17     | 1      | 0      | 4.012369                | -0.577039 | -0.156235 |
| 18     | 1      | 0      | 4.296209                | -2.301347 | 0.154686  |



|    |   |   |           |           |           |
|----|---|---|-----------|-----------|-----------|
| 19 | 1 | 0 | 3.986848  | -1.208508 | 1.510054  |
| 20 | 8 | 0 | 0.030871  | -3.625957 | 2.270894  |
| 21 | 1 | 0 | 0.465397  | -4.480793 | 2.116707  |
| 22 | 6 | 0 | 0.326201  | -1.108248 | 3.252207  |
| 23 | 1 | 0 | -0.484919 | -1.612642 | 3.781914  |
| 24 | 1 | 0 | 0.302830  | -0.049296 | 3.520487  |
| 25 | 1 | 0 | 1.276115  | -1.541937 | 3.577983  |
| 26 | 1 | 0 | -1.266219 | -2.294485 | -1.738561 |
| 27 | 6 | 0 | -0.935982 | -4.327070 | -0.218556 |
| 28 | 1 | 0 | -1.848178 | -4.168209 | 0.363543  |
| 29 | 1 | 0 | -0.424197 | -5.209694 | 0.179235  |
| 30 | 1 | 0 | -1.207607 | -4.540430 | -1.257302 |
| 31 | 8 | 0 | 2.771759  | -2.156203 | -2.016765 |
| 32 | 1 | 0 | 3.336528  | -2.908456 | -1.775098 |
| 33 | 6 | 0 | 0.438759  | -1.369409 | -3.166042 |
| 34 | 1 | 0 | 1.278309  | -0.915715 | -3.696696 |
| 35 | 1 | 0 | -0.481176 | -0.892184 | -3.512949 |
| 36 | 1 | 0 | 0.407252  | -2.434974 | -3.411794 |
| 37 | 8 | 0 | 0.487223  | 1.135007  | -2.204295 |
| 38 | 8 | 0 | -1.849895 | -0.038776 | 2.076664  |
| 39 | 6 | 0 | -2.786107 | -0.590775 | -0.629472 |
| 40 | 6 | 0 | -3.819499 | 0.164194  | 0.061618  |
| 41 | 1 | 0 | -3.743099 | 0.174789  | 1.142086  |
| 42 | 6 | 0 | -4.809607 | 0.860426  | -0.553367 |
| 43 | 1 | 0 | -4.845639 | 0.946108  | -1.642048 |

|    |   |   |           |           |           |
|----|---|---|-----------|-----------|-----------|
| 44 | 6 | 0 | -5.844500 | 1.580107  | 0.161619  |
| 45 | 1 | 0 | -5.815751 | 1.524010  | 1.250489  |
| 46 | 6 | 0 | -6.813924 | 2.300498  | -0.438820 |
| 47 | 1 | 0 | -6.828482 | 2.348657  | -1.529754 |
| 48 | 6 | 0 | -7.893015 | 3.057595  | 0.273607  |
| 49 | 1 | 0 | -7.807557 | 2.957559  | 1.360967  |
| 50 | 1 | 0 | -8.889076 | 2.702999  | -0.026486 |
| 51 | 1 | 0 | -7.854740 | 4.127242  | 0.023874  |
| 52 | 8 | 0 | -3.004907 | -0.895546 | -1.946103 |
| 53 | 1 | 0 | -3.938598 | -0.747672 | -2.163166 |
| 54 | 6 | 0 | 1.164619  | 1.917378  | 0.542480  |
| 55 | 6 | 0 | 0.832889  | 3.184772  | -0.206605 |
| 56 | 1 | 0 | 0.621368  | 2.939774  | -1.246790 |
| 57 | 1 | 0 | -0.082507 | 3.606688  | 0.234296  |
| 58 | 6 | 0 | 1.921752  | 4.275244  | -0.145753 |
| 59 | 1 | 0 | 1.537311  | 5.130529  | -0.721720 |
| 60 | 6 | 0 | 3.232443  | 3.839994  | -0.753280 |
| 61 | 1 | 0 | 3.186008  | 3.675646  | -1.831017 |
| 62 | 6 | 0 | 4.385541  | 3.640933  | -0.105134 |
| 63 | 1 | 0 | 4.422622  | 3.778162  | 0.976912  |
| 64 | 6 | 0 | 5.671291  | 3.209474  | -0.753454 |
| 65 | 1 | 0 | 5.551879  | 3.067659  | -1.832904 |
| 66 | 1 | 0 | 6.029666  | 2.265019  | -0.322531 |
| 67 | 1 | 0 | 6.465300  | 3.951110  | -0.591144 |
| 68 | 8 | 0 | 1.521442  | 2.095105  | 1.836433  |

|    |   |   |          |          |          |
|----|---|---|----------|----------|----------|
| 69 | 1 | 0 | 1.693563 | 3.048695 | 1.991680 |
| 70 | 8 | 0 | 2.032098 | 4.678118 | 1.236887 |
| 71 | 1 | 0 | 2.776061 | 5.294401 | 1.335024 |

#### Conformer 2-6

| Center | Atomic | Atomic | Coordinates (Angstroms) |           |           |
|--------|--------|--------|-------------------------|-----------|-----------|
| Number | Number | Type   | X                       | Y         | Z         |
| 1      | 6      | 0      | 0.371641                | -2.716926 | 1.311779  |
| 2      | 6      | 0      | -0.148373               | -3.069253 | -0.161093 |
| 3      | 8      | 0      | 1.011402                | -3.382027 | -0.946756 |
| 4      | 6      | 0      | 1.669867                | -2.120586 | -1.073086 |
| 5      | 6      | 0      | 2.160753                | -1.719645 | 0.395459  |
| 6      | 8      | 0      | 1.797169                | -2.802088 | 1.264390  |
| 7      | 6      | 0      | 0.545913                | -1.198595 | -1.645445 |
| 8      | 6      | 0      | 0.715783                | 0.294460  | -1.324179 |
| 9      | 6      | 0      | 1.095712                | 0.619689  | 0.059405  |
| 10     | 6      | 0      | 1.359057                | -0.528707 | 1.006918  |
| 11     | 6      | 0      | 0.125540                | -1.233075 | 1.735427  |
| 12     | 6      | 0      | -1.234498               | -0.674182 | 1.293236  |
| 13     | 6      | 0      | -1.616972               | -0.930048 | -0.103993 |
| 14     | 6      | 0      | -0.729131               | -1.835750 | -0.922503 |
| 15     | 1      | 0      | 1.971689                | -0.137917 | 1.819176  |
| 16     | 6      | 0      | 3.665419                | -1.515568 | 0.493534  |
| 17     | 1      | 0      | 4.217148                | -2.409844 | 0.185031  |
| 18     | 1      | 0      | 3.931796                | -1.301542 | 1.533506  |
| 19     | 1      | 0      | 3.984629                | -0.679919 | -0.135921 |

|    |   |   |           |           |           |
|----|---|---|-----------|-----------|-----------|
| 20 | 8 | 0 | -0.098821 | -3.589678 | 2.289482  |
| 21 | 1 | 0 | 0.301727  | -4.461350 | 2.137783  |
| 22 | 6 | 0 | 0.276346  | -1.074956 | 3.256313  |
| 23 | 1 | 0 | 0.278929  | -0.013700 | 3.517695  |
| 24 | 1 | 0 | 1.215997  | -1.528567 | 3.584846  |
| 25 | 1 | 0 | -0.546650 | -1.555256 | 3.789381  |
| 26 | 1 | 0 | -1.333022 | -2.239712 | -1.734754 |
| 27 | 6 | 0 | -1.085797 | -4.267421 | -0.198807 |
| 28 | 1 | 0 | -1.993299 | -4.071245 | 0.379270  |
| 29 | 1 | 0 | -0.608294 | -5.165981 | 0.205887  |
| 30 | 1 | 0 | -1.362377 | -4.476927 | -1.237005 |
| 31 | 8 | 0 | 2.710713  | -2.247242 | -1.991090 |
| 32 | 1 | 0 | 3.242035  | -3.021310 | -1.742495 |
| 33 | 6 | 0 | 0.415411  | -1.390228 | -3.164336 |
| 34 | 1 | 0 | 0.348728  | -2.456485 | -3.399453 |
| 35 | 1 | 0 | 1.274413  | -0.971721 | -3.692993 |
| 36 | 1 | 0 | -0.484837 | -0.885677 | -3.523010 |
| 37 | 8 | 0 | 0.517670  | 1.121988  | -2.217412 |
| 38 | 8 | 0 | -1.920964 | -0.041648 | 2.097463  |
| 39 | 6 | 0 | -2.731802 | -0.370846 | -0.686192 |
| 40 | 6 | 0 | -3.654626 | 0.558614  | -0.054585 |
| 41 | 1 | 0 | -3.309236 | 0.994782  | 0.874982  |
| 42 | 6 | 0 | -4.890044 | 0.864836  | -0.526178 |
| 43 | 1 | 0 | -5.297334 | 0.363291  | -1.407419 |
| 44 | 6 | 0 | -5.777916 | 1.816852  | 0.110371  |

|    |   |   |           |           |           |
|----|---|---|-----------|-----------|-----------|
| 45 | 1 | 0 | -5.400412 | 2.316813  | 1.003211  |
| 46 | 6 | 0 | -7.018059 | 2.104428  | -0.335181 |
| 47 | 1 | 0 | -7.382641 | 1.593722  | -1.229001 |
| 48 | 6 | 0 | -7.959232 | 3.081153  | 0.301649  |
| 49 | 1 | 0 | -8.893998 | 2.588411  | 0.603904  |
| 50 | 1 | 0 | -8.239930 | 3.876641  | -0.402898 |
| 51 | 1 | 0 | -7.518204 | 3.549510  | 1.188168  |
| 52 | 8 | 0 | -2.981657 | -0.724756 | -1.984452 |
| 53 | 1 | 0 | -3.634372 | -0.119490 | -2.368544 |
| 54 | 6 | 0 | 1.240515  | 1.902646  | 0.518081  |
| 55 | 6 | 0 | 0.988794  | 3.175884  | -0.252643 |
| 56 | 1 | 0 | 0.783732  | 2.927915  | -1.293476 |
| 57 | 1 | 0 | 0.088158  | 3.651406  | 0.163467  |
| 58 | 6 | 0 | 2.130653  | 4.210403  | -0.182763 |
| 59 | 1 | 0 | 1.801826  | 5.076269  | -0.777036 |
| 60 | 6 | 0 | 3.429831  | 3.701785  | -0.757481 |
| 61 | 1 | 0 | 3.398505  | 3.529323  | -1.834505 |
| 62 | 6 | 0 | 4.556706  | 3.450091  | -0.081961 |
| 63 | 1 | 0 | 4.577257  | 3.597126  | 0.999222  |
| 64 | 6 | 0 | 5.831233  | 2.942661  | -0.696512 |
| 65 | 1 | 0 | 5.729742  | 2.799221  | -1.777563 |
| 66 | 1 | 0 | 6.124789  | 1.982814  | -0.250795 |
| 67 | 1 | 0 | 6.661782  | 3.639483  | -0.519594 |
| 68 | 8 | 0 | 1.588495  | 2.078924  | 1.814965  |
| 69 | 1 | 0 | 1.810523  | 3.023831  | 1.960247  |

| 70            | 8      | 0      | 2.233463                | 4.625786  | 1.196737  |
|---------------|--------|--------|-------------------------|-----------|-----------|
| 71            | 1      | 0      | 3.005108                | 5.205715  | 1.302652  |
| Conformer 2-7 |        |        |                         |           |           |
| Center        | Atomic | Atomic | Coordinates (Angstroms) |           |           |
| Number        | Number | Type   | X                       | Y         | Z         |
| 1             | 6      | 0      | 3.017717                | 0.981135  | -1.106628 |
| 2             | 6      | 0      | 2.915935                | 1.553166  | 0.385271  |
| 3             | 8      | 0      | 3.774247                | 0.744519  | 1.201579  |
| 4             | 6      | 0      | 3.101400                | -0.515514 | 1.235162  |
| 5             | 6      | 0      | 3.153704                | -1.092321 | -0.257508 |
| 6             | 8      | 0      | 3.894526                | -0.145235 | -1.042062 |
| 7             | 6      | 0      | 1.665781                | -0.130949 | 1.721941  |
| 8             | 6      | 0      | 0.575258                | -1.123294 | 1.288222  |
| 9             | 6      | 0      | 0.600495                | -1.536818 | -0.118348 |
| 10            | 6      | 0      | 1.765815                | -1.086658 | -0.968088 |
| 11            | 6      | 0      | 1.691595                | 0.357527  | -1.646908 |
| 12            | 6      | 0      | 0.413332                | 1.107550  | -1.248592 |
| 13            | 6      | 0      | 0.344856                | 1.587681  | 0.141282  |
| 14            | 6      | 0      | 1.520138                | 1.307634  | 1.043040  |
| 15            | 1      | 0      | 1.846583                | -1.782933 | -1.803228 |
| 16            | 6      | 0      | 3.851890                | -2.440992 | -0.357788 |
| 17            | 1      | 0      | 3.313165                | -3.201616 | 0.214576  |
| 18            | 1      | 0      | 4.880310                | -2.393380 | 0.015903  |
| 19            | 1      | 0      | 3.894452                | -2.748234 | -1.407493 |
| 20            | 8      | 0      | 3.532286                | 1.900744  | -2.018259 |

|    |   |   |           |           |           |
|----|---|---|-----------|-----------|-----------|
| 21 | 1 | 0 | 4.467792  | 2.050377  | -1.804308 |
| 22 | 6 | 0 | 1.746217  | 0.205685  | -3.174774 |
| 23 | 1 | 0 | 2.678708  | -0.286552 | -3.465787 |
| 24 | 1 | 0 | 1.696673  | 1.176140  | -3.673679 |
| 25 | 1 | 0 | 0.900280  | -0.397244 | -3.512986 |
| 26 | 1 | 0 | 1.453983  | 2.000965  | 1.881615  |
| 27 | 6 | 0 | 3.367527  | 3.000820  | 0.508574  |
| 28 | 1 | 0 | 2.729482  | 3.659965  | -0.086985 |
| 29 | 1 | 0 | 4.402174  | 3.131141  | 0.174213  |
| 30 | 1 | 0 | 3.316041  | 3.306667  | 1.558393  |
| 31 | 8 | 0 | 3.727251  | -1.335840 | 2.170352  |
| 32 | 1 | 0 | 4.678597  | -1.349357 | 1.975629  |
| 33 | 6 | 0 | 1.639313  | 0.028902  | 3.249489  |
| 34 | 1 | 0 | 1.747185  | -0.934266 | 3.751969  |
| 35 | 1 | 0 | 0.686233  | 0.467700  | 3.556449  |
| 36 | 1 | 0 | 2.456296  | 0.682429  | 3.569054  |
| 37 | 8 | 0 | -0.247328 | -1.516790 | 2.120297  |
| 38 | 8 | 0 | -0.489047 | 1.248231  | -2.076106 |
| 39 | 6 | 0 | -0.731088 | 2.294303  | 0.628469  |
| 40 | 6 | 0 | -1.884648 | 2.741568  | -0.136553 |
| 41 | 1 | 0 | -1.765091 | 2.724412  | -1.213052 |
| 42 | 6 | 0 | -3.066996 | 3.130805  | 0.405474  |
| 43 | 1 | 0 | -3.243097 | 3.057464  | 1.481250  |
| 44 | 6 | 0 | -4.187245 | 3.610871  | -0.378877 |
| 45 | 1 | 0 | -4.038043 | 3.672009  | -1.457630 |

|    |   |   |           |           |           |
|----|---|---|-----------|-----------|-----------|
| 46 | 6 | 0 | -5.375127 | 3.974181  | 0.146552  |
| 47 | 1 | 0 | -5.509796 | 3.906804  | 1.228229  |
| 48 | 6 | 0 | -6.549879 | 4.472357  | -0.638975 |
| 49 | 1 | 0 | -6.333062 | 4.510049  | -1.711921 |
| 50 | 1 | 0 | -6.844711 | 5.479727  | -0.313073 |
| 51 | 1 | 0 | -7.426970 | 3.827257  | -0.488945 |
| 52 | 8 | 0 | -0.704439 | 2.607212  | 1.961427  |
| 53 | 1 | 0 | -1.365492 | 3.292776  | 2.146251  |
| 54 | 6 | 0 | -0.388427 | -2.294320 | -0.692464 |
| 55 | 6 | 0 | -1.632950 | -2.802958 | 0.000935  |
| 56 | 1 | 0 | -1.439330 | -3.824501 | 0.365025  |
| 57 | 1 | 0 | -1.795287 | -2.198665 | 0.893501  |
| 58 | 6 | 0 | -2.888232 | -2.808350 | -0.882382 |
| 59 | 1 | 0 | -3.021564 | -1.814654 | -1.326778 |
| 60 | 6 | 0 | -4.161975 | -3.214821 | -0.189341 |
| 61 | 1 | 0 | -5.031251 | -3.232205 | -0.849471 |
| 62 | 6 | 0 | -4.309878 | -3.546228 | 1.099793  |
| 63 | 1 | 0 | -3.449172 | -3.517414 | 1.767745  |
| 64 | 6 | 0 | -5.612282 | -3.945366 | 1.733135  |
| 65 | 1 | 0 | -5.538248 | -4.941496 | 2.189834  |
| 66 | 1 | 0 | -6.430907 | -3.960516 | 1.005376  |
| 67 | 1 | 0 | -5.882536 | -3.250296 | 2.539595  |
| 68 | 8 | 0 | -0.251078 | -2.626534 | -1.994296 |
| 69 | 1 | 0 | -1.045162 | -3.131704 | -2.290684 |
| 70 | 8 | 0 | -2.695923 | -3.662174 | -2.056844 |



|    |   |   |           |           |           |
|----|---|---|-----------|-----------|-----------|
| 71 | 1 | 0 | -2.805682 | -4.587479 | -1.777966 |
|----|---|---|-----------|-----------|-----------|

|    |   |   |           |           |           |
|----|---|---|-----------|-----------|-----------|
| 42 | 6 | 0 | -4.503537 | -0.310927 | -0.654109 |
| 43 | 1 | 0 | -4.332334 | -0.191304 | -1.724301 |
| 44 | 6 | 0 | -5.872983 | -0.402691 | -0.196481 |
| 45 | 1 | 0 | -6.055399 | -0.518613 | 0.869563  |
| 46 | 6 | 0 | -6.922735 | -0.349332 | -1.039317 |
| 47 | 1 | 0 | -6.752979 | -0.232795 | -2.110296 |
| 48 | 8 | 0 | -1.813951 | -0.122678 | -1.590539 |
| 49 | 6 | 0 | -8.360287 | -0.437662 | -0.635962 |
| 50 | 1 | 0 | -8.827902 | -1.287504 | -1.162845 |
| 51 | 1 | 0 | -8.883279 | 0.473381  | -0.974830 |
| 52 | 8 | 0 | -8.469335 | -0.591936 | 0.773189  |
| 53 | 1 | 0 | -9.405906 | -0.635707 | 1.015624  |

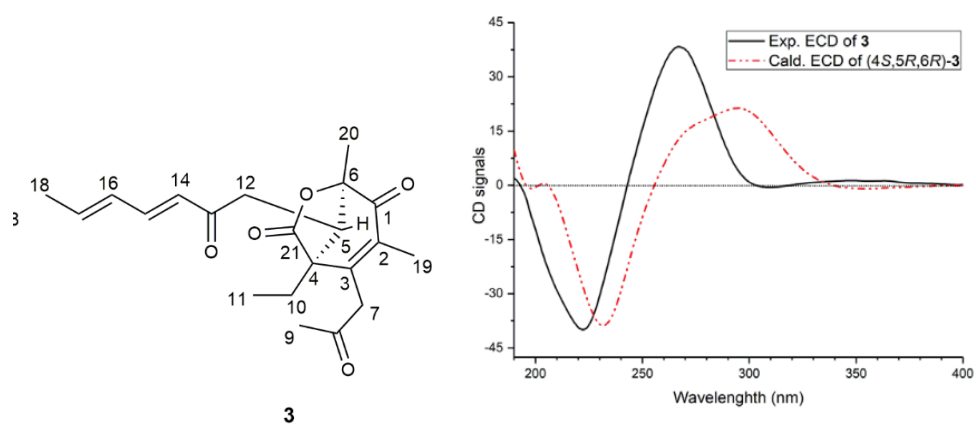

**Figure S41** Calculated and experimental ECD spectra of trichodermolide B

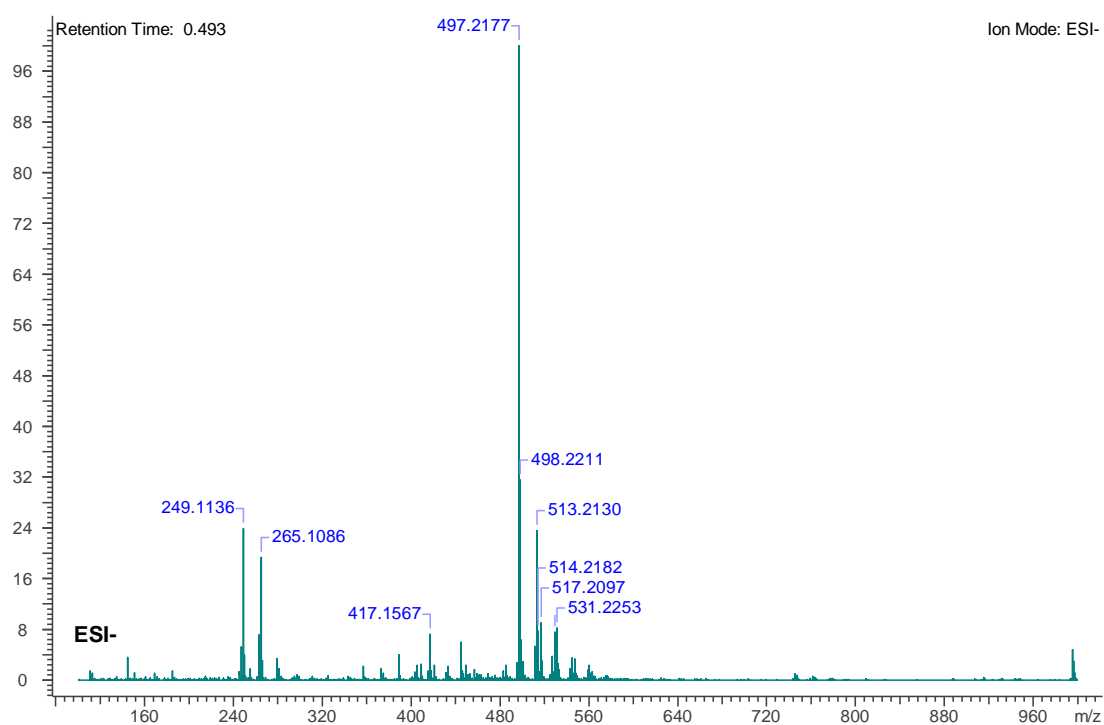

**Figure S42** HR-ESI-MS spectra of compound 11
